# Supplementary material
Source: PubMed Central journal article supplement (PMC3366368)

# Supporting Information

## Diastereocontrolled Construction of Pactamycin's Complex Ureido Triol Functional Array

Justin T. Malinowski, Stefan J. McCarver, and Jeffrey S. Johnson\*

*Department of Chemistry, University of North Carolina at Chapel Hill, Chapel Hill, North Carolina 27599-3290, United States*

[jsj@unc.edu](mailto:jsj@unc.edu)

### Table of Contents

|                                                       |                |
|-------------------------------------------------------|----------------|
| General Methods and Materials                         | <b>S2</b>      |
| Experimental Procedures                               | <b>S3-S13</b>  |
| Preparation of Enantioenriched ( <i>R</i> )- <b>9</b> | <b>S14</b>     |
| <sup>1</sup> H, <sup>13</sup> C NMR Spectra           | <b>S15-S44</b> |

**Methods: General.** Infrared (IR) spectra were obtained using a Jasco 460 Plus Fourier transform infrared spectrometer. Proton and carbon magnetic resonance spectra ( $^1\text{H}$  NMR and  $^{13}\text{C}$  NMR) were recorded on a Bruker model Avance 400 ( $^1\text{H}$  NMR at 400 MHz and  $^{13}\text{C}$  at 100 MHz), Bruker model Avance 500 ( $^1\text{H}$  NMR at 500 MHz and  $^{13}\text{C}$  NMR at 125 MHz), or a Bruker Avance III 600 ( $^1\text{H}$  NMR at 600 MHz and  $^{13}\text{C}$  NMR at 150 MHz) spectrometer with solvent resonance as the internal standard ( $^1\text{H}$  NMR:  $\text{CDCl}_3$  at 7.26 ppm;  $^{13}\text{C}$  NMR:  $\text{CDCl}_3$  at 77.0 ppm).  $^1\text{H}$  NMR data are reported as follows: chemical shift, multiplicity (s = singlet, br s = broad singlet, d = doublet, br d = broad doublet, t = triplet, q = quartet, m = multiplet), coupling constants (Hz), and integration. Mass spectra were obtained using a Bruker BioTOF II spectrometer with electrospray ionization calibrated with CsOAc or an Agilent Technologies 6520, Accurate – Mass QTOF LCMS, 1200 series LC with dual spray ESI source. All samples were prepared in methanol. Analytical thin layer chromatography (TLC) was performed on Sorbent Technologies 0.20 mm Silica G TLC plates. Visualization was accomplished with UV light,  $\text{KMnO}_4$ , and/or aqueous ceric ammonium nitrate solution followed by heating. Purification of the reaction products was carried out by flash chromatography using Siliaflash-P60 silica gel (40–63 $\mu\text{m}$ ) purchased from Silicycle. Supercritical fluid chromatography was performed on a Berger SFC system equipped with a Chiralcel OD column. Samples were eluted with SFC grade  $\text{CO}_2$  at the indicated percentage of MeOH. Unless otherwise noted, all reactions were carried out under an atmosphere of dry nitrogen in oven-dried glassware with magnetic stirring. Yield refers to isolated yield of analytically pure material unless otherwise noted. Yields are reported for a specific experiment and as a result may differ slightly from those found in the tables, which are averages of at least two experiments.

**Materials: General.** Tetrahydrofuran, diethyl ether, dichloromethane, and toluene were dried by passage through a column of neutral alumina under nitrogen prior to use. Cerium trichloride was dried under high-vacuum at 60 °C for 2 h, 80 °C for 2 h, and 140 °C for 12 h prior to storage in a nitrogen-filled glove box.<sup>1</sup> Triethylamine was freshly distilled from calcium hydride prior to use. Pentane was freshly distilled from sodium hydride prior to use. Methyl diazoacetate (**7**) was prepared by a known procedure.<sup>2</sup> 2-bromopropenol (**15**) was prepared via the procedure of Corey.<sup>3</sup>

All other reagents were purchased from commercial sources and were used as received unless otherwise noted.

---

<sup>1</sup> For  $\text{CeCl}_3$  purification methods see: (a) Dimitrov, V.; Kostova, K.; Genov, M. *Tetrahedron Lett.* **1996**, *37*, 6787. (b) Imamoto, T.; Kusumoto, T.; Tawarayama, Y.; Sugiura, Y.; Mita, T.; Hatanaka, Y.; Yokoyama, M. *J. Org. Chem.* **1984**, *49*, 3904.

<sup>2</sup> Greszler, S. N.; Johnson, J. S. *Angew. Chem. Int. Ed.* **2009**, *48*, 3689.

<sup>3</sup> Snyder, S. A.; Corey, E. J. *J. Am. Chem. Soc.* **2006**, *128*, 740–742.

## Experimental Procedures:

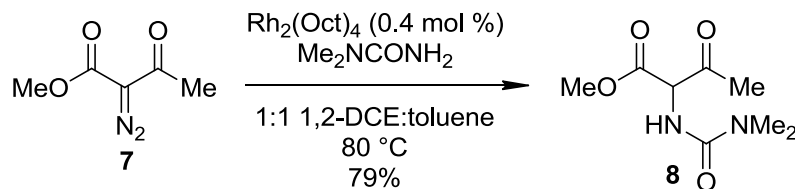

**Methyl 2-(3,3-dimethylureido)-3-oxobutanoate (8):** A 1-L round-bottomed flask was charged with methyl diazoacetate **7** (13.17 g, 92.0 mmol, 1.00 equiv) and finely ground 1,1-dimethylurea (12.16 g, 138 mmol, 1.50 equiv). Toluene (275 mL) and 1,2-dichloroethane (275 mL) were added and the suspension was heated to 80 °C in a sand bath with magnetic stirring. The solution gradually became homogenous upon heating. Four portions of  $\text{Rh}_2(\text{Oct})_4$  (0.071 g, 0.001 mmol, 0.001 equiv, each portion) suspended in toluene were added over 30 min. The reaction was allowed to stir until consumption of starting material was indicated by TLC analysis, typically 1 h. The reaction was allowed to cool to rt; excess 1,1-dimethylurea precipitated upon cooling. The urea was removed via filtration (cotton) and the filtrate was concentrated *in vacuo*. The product was purified via flash chromatography (70:30 to 60:40 petroleum ether/acetone) to give the desired product as a yellow solid (14.78 g, 79%). Analytical data: **mp** 61-64 °C;  **$^1\text{H NMR}$**  (600 MHz,  $\text{CDCl}_3$ ):  $\delta$  5.59 (s, 1H), 5.17 (d,  $J = 6.0$  Hz, 1H), 3.78 (s, 3H), 2.92 (s, 6H), 2.35 (s, 3H);  **$^{13}\text{C NMR}$**  (150 MHz,  $\text{CDCl}_3$ ):  $\delta$  199.8, 167.6, 156.8, 64.3, 53.1, 36.1, 28.0; **HRMS (ESI<sup>+</sup>)** Calcd. for  $\text{C}_8\text{H}_{14}\text{N}_2\text{O}_4 + \text{Na}$ , 225.0852; Found, 225.0844; **IR** (thin film,  $\text{cm}^{-1}$ ) 3431, 2955, 1751, 1647, 1522, 1382, 1270, 1206; **TLC** (70:30 petroleum ether/acetone):  $R_f = 0.20$ .

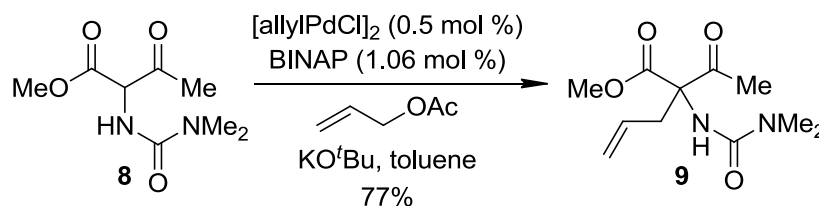

**Methyl 2-acetyl-2-(3,3-dimethylureido)pent-4-enoate (9):** In a nitrogen-filled glove box a flame-dried 100-mL round-bottomed flask was charged with allylpalladium chloride dimer (0.120 g, 0.328 mmol, 0.005 equiv) and *rac*-BINAP (0.432 g, 0.695 mmol, 0.0106 equiv). Toluene (20 mL) was added and the suspension was stirred for 10 min, capped with a rubber septum, and removed from the glove box. Allyl acetate (7.85 mL, 72.13 mmol, 1.10 equiv) was added and the catalyst solution was stirred for an additional 10 min. A separate flame-dried 1000-mL round-bottomed flask was charged with  $\beta$ -keto ester **8** (13.26 g, 65.57 mmol, 1.00 equiv) and  $\text{KO}^t\text{Bu}$  (7.72 g, 68.84 mmol, 1.05 equiv). Toluene (360 mL) was added and the suspension was stirred under a nitrogen atmosphere. The catalyst solution was introduced via cannula transfer, and the reaction was stirred for 12 h. The reaction was quenched with 1 M HCl (200 mL) and extracted with EtOAc (2 x 100 mL). The combined organic extracts were washed with brine, dried with magnesium sulfate, and concentrated *in vacuo*. The product was purified via flash chromatography (70:30 petroleum ether/acetone) to give the desired product as a pale

yellow oil (12.27 g, 77%). Analytical data:  $^1\text{H NMR}$  (600 MHz,  $\text{CDCl}_3$ ):  $\delta$  5.95 (s, 1H), 5.54-5.48 (m, 1H), 5.10-5.06 (m, 2H), 3.75 (s, 3H), 3.15 (dd,  $J = 14.4, 6.6$  Hz, 1H), 2.99 (dd,  $J = 14.4, 7.8$  Hz, 1H), 2.90 (s, 6H), 2.16 (s, 3H);  $^{13}\text{C NMR}$  (150 MHz,  $\text{CDCl}_3$ ):  $\delta$  200.1, 169.5, 156.0, 131.6, 119.3, 72.0, 53.3, 36.9, 36.0, 24.7; **HRMS (ESI<sup>+</sup>)** Calcd. for  $\text{C}_{11}\text{H}_{18}\text{N}_2\text{O}_4 + \text{Cs}$ , 375.0321; Found, 375.0319; **IR** (thin film,  $\text{cm}^{-1}$ ) 3429, 2953, 1726, 1653, 1517, 1368, 1280, 1226; **TLC** (70:30 petroleum ether/acetone):  $R_f = 0.30$ .

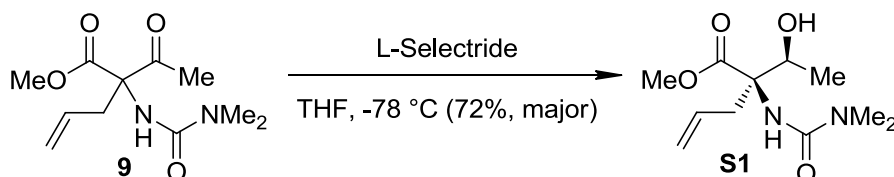

**Methyl 2-(3,3-dimethylureido)-2-(1-hydroxyethyl)pent-4-enoate (S1):** A flame-dried 250-mL round-bottomed flask was charged with ketone **9** (3.56 g, 14.71 mmol, 1.00 equiv) and THF (60 mL). The solution was cooled to  $-78$   $^\circ\text{C}$ , and L-Selectride<sup>®</sup> (1 M in THF, 22.07 mL, 22.07 mmol, 1.50 equiv) was added dropwise. The reaction was stirred under a nitrogen atmosphere until consumption of starting material was indicated by TLC analysis, typically 4 h. The reaction was quenched by the sequential addition (5 mL) of  $\text{H}_2\text{O}$ , EtOH, 1 M NaOH, and 30%  $\text{H}_2\text{O}_2$  and allowed to warm to rt. Saturated aqueous  $\text{Na}_2\text{S}_2\text{O}_4$  (30 mL) was added and the solution was then extracted with EtOAc (3 x 20 mL). The combined organic extracts were washed with brine, dried with magnesium sulfate, and concentrated *in vacuo*. The product was purified via flash chromatography (80:20 to 60:40 petroleum ether/acetone) to give the product diastereomers as pale yellow solids (major, 2.59 g, 72%, minor, 0.737 g, 21%). Analytical data: **mp** 71-74  $^\circ\text{C}$ ;  $^1\text{H NMR}$  (600 MHz,  $\text{CDCl}_3$ ):  $\delta$  6.18 (d,  $J = 10.2$  Hz, 1H), 5.60-5.57 (m, 1H), 5.23-5.20 (m, 2H), 4.86 (s, 1H), 4.06-4.03 (m, 1H), 3.78 (s, 3H), 2.92 (s, 6H), 2.75 (d,  $J = 13.2$ , 1H), 2.34 (t,  $J = 12.6$ , 1H), 1.18 (d,  $J = 6.0$ , 3H);  $^{13}\text{C NMR}$  (150 MHz,  $\text{CDCl}_3$ ):  $\delta$  172.8, 158.7, 132.5, 120.8, 71.4, 68.1, 52.6, 40.4, 36.6, 18.1; **HRMS (ESI<sup>+</sup>)** Calcd. for  $\text{C}_{11}\text{H}_{20}\text{N}_2\text{O}_4 + \text{Cs}$ , 377.0477; Found, 377.0464; **IR** (thin film,  $\text{cm}^{-1}$ ) 3421, 2980, 1753, 1636, 1524, 1457, 1377, 1220, 1120; **TLC** (70:30 petroleum ether/acetone):  $R_f = 0.20$ .

### Crude $^1\text{H NMR}$ Spectrum of S1:

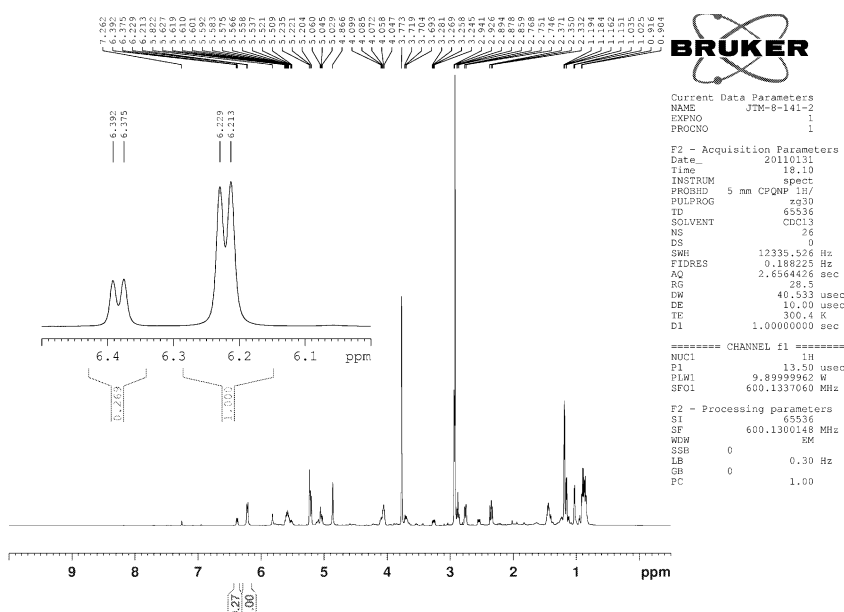

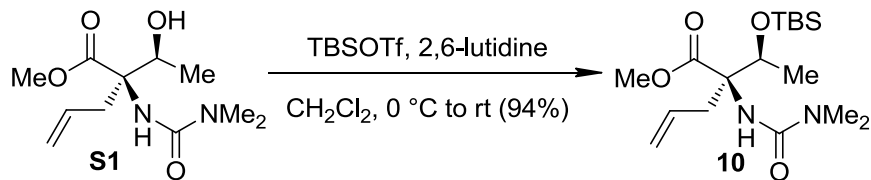

**Methyl 2-(1-((*tert*-butyldimethylsilyl)oxy)ethyl)-2-(3,3-dimethylureido)pent-4-enoate (10):**

A flame-dried 500-mL round-bottomed flask was charged with alcohol **S1** (8.50 g, 35.12 mmol, 1.00 equiv) and  $\text{CH}_2\text{Cl}_2$  (175 mL). 2,6-lutidine (12.10 mL, 105 mmol, 3.00 equiv) was added and the solution was cooled 0 °C. TBSOTf (16.11 mL, 70.24 mmol, 2.00 equiv) was added dropwise and the reaction was allowed to slowly warm to rt over 12 h by allowing the ice-water bath to expire. The reaction was quenched by the addition of saturated aqueous  $\text{NaHCO}_3$  (100 mL). The solution was extracted with  $\text{Et}_2\text{O}$ , washed with 1 M HCl and brine. The organic extracts were dried with magnesium sulfate, and concentrated *in vacuo*. The product was purified via flash chromatography (95:5 to 90:10 petroleum ether/acetone) to give the desired product as a pale yellow oil (11.06 g, 88%). Analytical data:  $^1\text{H NMR}$  (600 MHz,  $\text{CDCl}_3$ ):  $\delta$  5.84-5.76 (m, 1H), 5.31 (s, 1H), 4.98-4.95 (m, 2H), 4.28 (q,  $J = 6.0$ , 1H), 3.70 (s, 3H), 3.01 (dd,  $J = 13.8$ , 6.0 Hz, 1H), 2.86 (s, 6H), 2.73 (dd,  $J = 13.8$ , 7.8 Hz, 1H), 1.10 (d,  $J = 6.0$ , 3H), 0.85 (s, 9H), 0.04 (s, 6H);  $^{13}\text{C NMR}$  (150 MHz,  $\text{CDCl}_3$ ):  $\delta$  173.4, 157.1, 134.5, 177.2, 72.0, 67.2, 52.3, 36.1, 35.3, 25.58, 18.75, 17.72, -4.1, -5.1; **HRMS (ESI<sup>+</sup>)** Calcd. for  $\text{C}_{17}\text{H}_{34}\text{N}_2\text{O}_4\text{Si}+\text{Cs}$ , 491.1342; Found, 491.1341; **IR** (thin film,  $\text{cm}^{-1}$ ) 3437, 2954, 2857, 1739, 1655, 1509, 1380, 1264, 1128, 834, 739; **TLC** (70:30 petroleum ether/acetone):  $R_f = 0.60$ .

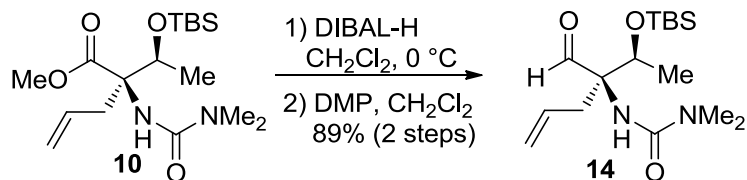

**3-(2-((*tert*-butyldimethylsilyl)oxy)-3-formylhex-5-en-3-yl)-1,1-dimethylurea (14):** A flame-dried 500-mL round-bottomed flask was charged with ester **10** (9.87 g, 27.7 mmol, 1.00 equiv) and  $\text{CH}_2\text{Cl}_2$  (150 mL). The solution was cooled -78 °C and a solution of DIBAL-H was added (10.87 mL in 50 mL  $\text{CH}_2\text{Cl}_2$ , 61.0 mmol, 2.20 equiv). The reaction was allowed to warm to 0 °C was stirred at that temperature under a nitrogen atmosphere until consumption of starting material was indicated by TLC analysis, typically 2 h. The reaction was then cooled to -78 °C and acetone (300 mL) was added. Stirring continued for 10 min and 10% aqueous Rochelle's salt (200 mL) was added. The reaction was allowed to warm to rt and stirred for 1 h. The organic layer was extracted with  $\text{Et}_2\text{O}$ , washed with brine, dried with magnesium sulfate, and concentrated *in vacuo*. The crude alcohol product was taken on directly to the next step.

A 500-mL round-bottomed flask was charged with the crude alcohol and  $\text{CH}_2\text{Cl}_2$  (150 mL). Dess Martin's periodinane (12.91 g, 30.50 mmol, 1.10 equiv) was added. The reaction was stirred at rt until consumption of starting material was indicated by TLC analysis, typically 30 min. Saturated  $\text{NaHCO}_3$ ,  $\text{Na}_2\text{S}_2\text{O}_4$ , and  $\text{Et}_2\text{O}$  (50 mL, each) were added and stirring was continued

until two clear layers formed. The organic layer was extracted with Et<sub>2</sub>O, washed with brine, dried with magnesium sulfate, and concentrated *in vacuo*. The product was purified via flash chromatography (90:10 to 85:15 petroleum ether/acetone) to give the desired product as a waxy solid (8.04 g, 89%). Analytical data: <sup>1</sup>H NMR (600 MHz, CDCl<sub>3</sub>): δ 9.61 (s, 1H), 5.64-5.57 (m, 1H), 5.42 (s, 1H), 5.04 (d, *J* = 6.6, 1H), 5.02 (s, 1H), 4.57 (q, *J* = 6.0, 1H), 3.07 (dd, *J* = 14.4, 7.2 Hz, 1H), 2.91 (s, 6H), 2.84 (dd, *J* = 14.4, 7.8 Hz, 1H), 1.09 (d, *J* = 6.6, 3H), 0.91 (s, 9H), 0.14 (s, 3H), 0.09 (s, 3H); <sup>13</sup>C NMR (150 MHz, CDCl<sub>3</sub>): δ 202.0, 156.9, 133.0, 118.4, 70.9, 68.7, 36.2, 33.8, 25.8, 19.0, 17.9, -4.2, -5.0; HRMS (ESI<sup>+</sup>) Calcd. for C<sub>16</sub>H<sub>32</sub>N<sub>2</sub>O<sub>3</sub>Si+Na, 351.2080; Found, 351.2076; IR (thin film, cm<sup>-1</sup>) 2930, 2858, 1731, 1652, 1515, 1377, 1256, 1103, 836; TLC (90:10 petroleum ether/acetone): R<sub>f</sub> = 0.20.

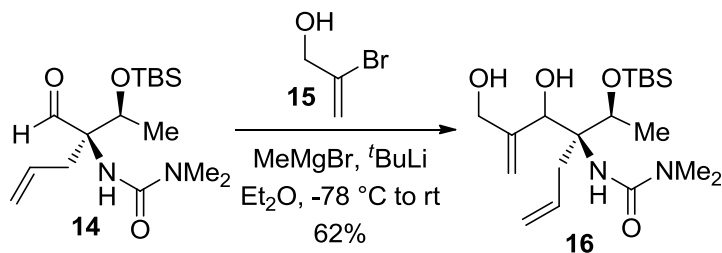

**3-(1-((*tert*-butyldimethylsilyl)oxy)ethyl)-3-hydroxy-2-(hydroxymethyl)hepta-1,6-dien-4-yl)-1,1-dimethylurea (16):** A flame-dried 250-mL round-bottomed flask was charged with 2-bromopropenol **15** (2.49 g, 18.17 mmol, 2.20 equiv) and Et<sub>2</sub>O (100 mL). The solution was cooled to 0 °C under a nitrogen atmosphere. Methylmagnesium bromide (3.0 M, 6.05 mL, 18.17 mmol, 2.20 equiv) was added dropwise and the reaction was cooled to -78 °C. *tert*-Butyllithium (1.5 M, 24.0 mL, 36.34 mmol, 4.40 equiv) was added over 1 h via syringe pump. After the addition was complete the solution was warmed to 0 °C and stirred for 3 h. The reaction was cooled to -78 °C, and a solution of aldehyde **14** in Et<sub>2</sub>O (15 mL) was added (2.71 g, 8.26 mmol, 1.00 equiv). The reaction was allowed to warm to rt over 12 h. Saturated NH<sub>4</sub>Cl was added (50 mL) and the organic layer was extracted with Et<sub>2</sub>O, washed with brine, dried with magnesium sulfate, and concentrated *in vacuo*. The product diastereomers (~1:1, inconsequential, not separated) were purified via flash chromatography (90:10 to 70:30 petroleum ether/diethyl ether) to give the desired product as a colorless oil (1.99 g, 60%). Analytical data: <sup>1</sup>H NMR (400 MHz, CDCl<sub>3</sub>): δ 7.72 (d, *J* = 8.8 Hz), 7.67 (d, *J* = 9.6 Hz), 6.18-6.12 (m), 6.00-5.95 (m), 5.12 (s), 5.35 (s), 5.31 (s), 5.17-4.96 (m), 4.86 (q, *J* = 6.4 Hz), 4.78 (s), 4.33-4.27 (m), 4.18-4.07 (m), 3.12 (dd, *J* = 14.8, 9.6 Hz), 2.90 (s), 2.86 (s), 2.55 (dd, *J* = 13.6, 9.6 Hz), 2.41 (dd, *J* = 15.2, 6.0 Hz), 2.17 (dd, *J* = 14.4, 9.2 Hz), 1.32 (d, *J* = 6.0 Hz), 1.29 (d, *J* = 6.0 Hz), 0.89 (s), 0.87 (s), 0.10 (s), 0.07 (s), 0.07 (s), -0.07(s); <sup>13</sup>C NMR (100 MHz, CDCl<sub>3</sub>): δ 159.6, 159.0, 149.6, 149.4, 136.2, 135.2, 118.8, 116.8, 115.3, 115.0, 79.8, 77.9, 71.9, 67.8, 64.6, 64.2, 62.7, 37.4, 36.9, 36.6, 34.3, 25.8, 19.0, 18.9, 17.9, 17.9, -4.1, -4.2, -4.2, -5.5; HRMS (ESI<sup>+</sup>) Calcd. for C<sub>19</sub>H<sub>38</sub>N<sub>2</sub>O<sub>4</sub>Si+H, 387.2679; Found, 387.2685; IR (thin film, cm<sup>-1</sup>) 3410, 2930, 1630, 1527, 1265, 838, 739; TLC (70:30 petroleum ether/acetone): R<sub>f</sub> = 0.30.

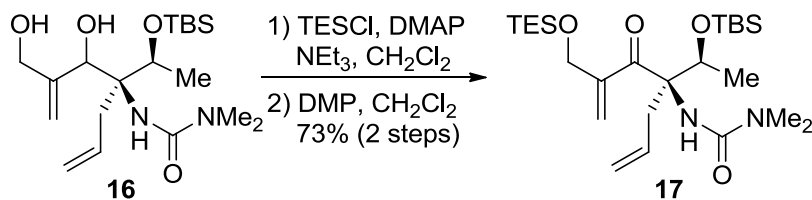

**3-(6-allyl-11,11-diethyl-2,2,3,3,5-pentamethyl-8-methylene-7-oxo-4,10-dioxo-3,11-disilatridecan-6-yl)-1,1-dimethylurea (17):** A flame-dried 250-mL round-bottomed flask was charged with diol **16** (0.90 g, 2.33 mmol, 1.00 equiv), DMAP (0.085 g, 0.699 mmol, 0.30 equiv), and CH<sub>2</sub>Cl<sub>2</sub> (60 mL). The solution was cooled to 0 °C under a nitrogen atmosphere and triethylamine (0.65 mL, 4.66 mmol, 2.00 equiv) was added. Triethylsilyl chloride (0.47 mL, 2.79 mmol, 1.20 equiv) was added dropwise and the reaction was allowed to slowly warm to rt over 12 h. Saturated NaHCO<sub>3</sub> was added (50 mL) and the organic layer was extracted with Et<sub>2</sub>O, washed with brine, dried with magnesium sulfate, and concentrated *in vacuo*. The crude monoalcohol was taken on directly to the next step.

A 100-mL round-bottomed flask was charged with the crude monoalcohol and CH<sub>2</sub>Cl<sub>2</sub> (40 mL). Dess Martin's periodinane (1.48 g, 3.50 mmol, 1.50 equiv) was added. The reaction was stirred at rt until consumption of starting material was indicated by TLC analysis, typically 1 h. Saturated NaHCO<sub>3</sub>, Na<sub>2</sub>S<sub>2</sub>O<sub>4</sub>, and Et<sub>2</sub>O (15 mL, each) were added and stirring was continued until two clear layers formed. The organic layer was extracted with Et<sub>2</sub>O, washed with brine, dried with magnesium sulfate, and concentrated *in vacuo*. The product was purified via flash chromatography (90:10 petroleum ether/acetone) to give the desired product as a colorless oil (0.793 g, 68%). Analytical data: <sup>1</sup>H NMR (500 MHz, CDCl<sub>3</sub>): δ 6.50 (s, 1H), 6.01 (s, 1H), 5.88-5.79 (m, 1H), 5.58 (s, 1H), 4.97-4.89 (m, 2H), 4.53 (q, *J* = 6.5 Hz, 1H), 4.36 (s, 2H), 2.93 (dd, *J* = 14.0, 6.5 Hz, 1H), 2.86 (s, 6H), 2.78 (dd, *J* = 14.5, 14.0 Hz, 1H), 1.08 (d, *J* = 6.0 Hz, 3H), 0.95 (t, *J* = 8.0 Hz, 9H), 0.93 (s, 9H), 0.61 (q, *J* = 8.0 Hz), 0.15 (s, 3H), 0.11 (s, 3H); <sup>13</sup>C NMR (100 MHz, CDCl<sub>3</sub>): δ 199.4, 157.2, 145.1, 135.4, 120.8, 117.0, 71.4, 70.7, 61.9, 36.2, 35.4, 25.7, 18.8, 17.9, 6.7, 4.4, -4.1, -4.8; HRMS (ESI<sup>+</sup>) Calcd. for C<sub>25</sub>H<sub>50</sub>N<sub>2</sub>O<sub>4</sub>Si<sub>2</sub>+H, 499.3387; Found, 499.3391; IR (thin film, cm<sup>-1</sup>) 3427, 2955, 1655, 1502, 1097, 950, 834, 738; TLC (90:10 Petroleum Ether/Acetone): R<sub>f</sub> = 0.30.

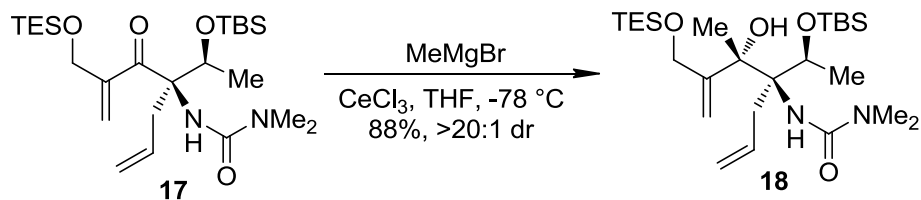

**3-(6-allyl-11,11-diethyl-7-hydroxy-2,2,3,3,5,7-hexamethyl-8-methylene-4,10-dioxo-3,11-disilatridecan-6-yl)-1,1-dimethylurea (18):** In a nitrogen-filled glove box a flame-dried 100-mL round-bottomed flask was charged with cerium trichloride (1.29 g, 5.25 mmol, 5.00 equiv).<sup>1</sup> The flask was capped with a rubber septum and removed from the glove box. THF (20 mL) was added at 0 °C and stirred at that temperature for 3 h. The solution was cooled to -78 °C and methylmagnesium bromide (3.0 M, 1.75 mL, 5.25 mmol, 5.00 equiv) was added. The reaction

was stirred for 1 h followed by the addition of a THF solution (5 mL) of enone **17** (0.524 g, 1.05 mmol, 1.00 equiv). The reaction was then stirred at -78 °C for 5 h. Aqueous acetic acid (0.5 M, 20 mL) was added and the solution was warmed to rt. The organic layer was extracted with Et<sub>2</sub>O, washed with saturated NaHCO<sub>3</sub>, brine, dried with magnesium sulfate, and concentrated *in vacuo*. The product was purified via flash chromatography (95:5 petroleum ether/acetone) to give the desired product with >20:1 diastomeric ratio as a colorless oil (0.476 g, 88%). Analytical data: **<sup>1</sup>H NMR** (600 MHz, CDCl<sub>3</sub>): δ 7.81 (s, 1H), 6.02-5.94 (m, 1H), 5.53 (s, 1H), 5.42 (s, 1H), 5.08 (d, *J* = 17.4 Hz, 1H), 5.05 (d, *J* = 10.2 Hz, 1H), 4.98 (s, 1H), 4.58 (q, *J* = 6.0 Hz, 1H), 4.39 (d, *J* = 15.6 Hz, 1H), 4.21 (d, *J* = 15.6 Hz, 1H), 2.88 (dd, *J* = 12.0, 6.0 Hz, 1H), 2.85 (s, 6H), 2.58 (dd, *J* = 15.0, 5.4 Hz, 1H), 1.33 (d, *J* = 6.0 Hz, 3H), 1.32 (s, 3H), 0.94 (t, *J* = 8.4 Hz, 9H), 0.87 (s, 9H), 0.59 (q, *J* = 7.8 Hz, 6H), 0.11 (s, 3H), 0.02 (s, 3H); **<sup>13</sup>C NMR** (150 MHz, CDCl<sub>3</sub>): δ 159.4, 154.4, 135.9, 117.7, 110.6, 79.3, 69.0, 67.2, 62.9, 36.7, 34.4, 27.8, 21.5, 17.9, 6.8, 4.4, -4.1, -4.6; **HRMS (ESI<sup>+</sup>)** Calcd. for C<sub>26</sub>H<sub>54</sub>N<sub>2</sub>O<sub>4</sub>Si<sub>2</sub>+Na, 537.3520; Found, 537.3525; **IR** (thin film, cm<sup>-1</sup>) 3390, 2955, 1631, 1265, 1080, 837, 740; **TLC** (90:10 petroleum ether/acetone): R<sub>f</sub> = 0.30.

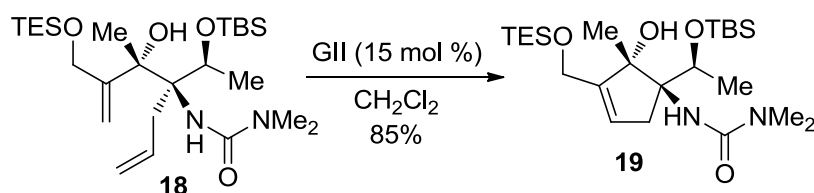

### 3-(1-(1-((tert-butyldimethylsilyl)oxy)ethyl)-2-hydroxy-2-methyl-3-

(((triethylsilyl)oxy)methyl)cyclopent-3-en-1-yl)-1,1-dimethylurea (**19**): In a nitrogen-filled glove box a flame-dried 250-mL round-bottomed flask was charged with Grubbs's second generation catalyst (0.152 g, 0.18 mmol, 0.15 equiv). The flask was capped with a rubber septum and removed from the glove box. CH<sub>2</sub>Cl<sub>2</sub> (70 mL) was added followed by a CH<sub>2</sub>Cl<sub>2</sub> solution (5 mL) of diene **18** (0.618 g, 1.20 mmol, 1.00 equiv). The reaction stirred for 12 h under a nitrogen atmosphere. The reaction was then concentrated *in vacuo*. The product was purified via flash chromatography (90:10 to 80:20 hexanes/ethyl acetate) to give the desired product as white solid (0.495 g, 85%). Analytical data: **mp** 67-70 °C; **<sup>1</sup>H NMR** (500 MHz, CDCl<sub>3</sub>): δ 5.45 (s, 1H) 4.90 (s, 1H), 4.67 (s, 1H), 4.56 (q, *J* = 6.0 Hz, 1H), 4.31 (d, *J* = 16.0, 1H), 4.27 (d, *J* = 16.5, 1H), 2.90 (s, 6H), 2.80 (d, *J* = 15.5 Hz, 1H), 1.91 (d, *J* = 15.0 Hz, 1H), 1.25 (s, 3H), 1.09 (d, *J* = 6.5 Hz, 3H), 0.95 (t, *J* = 8.0 Hz, 9H), 0.87 (s, 9H), 0.61 (q, *J* = 8.0 Hz, 6H), 0.04 (s, 3H), -0.08 (s, 3H); **<sup>13</sup>C NMR** (100 MHz, CDCl<sub>3</sub>): δ 159.0, 149.5, 118.9, 83.7, 73.1, 68.0, 59.3, 36.6, 36.4, 25.9, 24.8, 21.8, 17.9, 6.7, 4.3, -4.1, -5.4; **HRMS (ESI<sup>+</sup>)** Calcd. for C<sub>24</sub>H<sub>50</sub>N<sub>2</sub>O<sub>4</sub>Si<sub>2</sub>+H, 487.3387; Found, 487.3386; **IR** (thin film, cm<sup>-1</sup>) 3417, 2955, 1632, 1517, 1265, 1084, 834, 739; **TLC** (90:10 hexanes/EtOAc): R<sub>f</sub> = 0.40.



# <sup>1</sup>H nOesy analysis of 19:

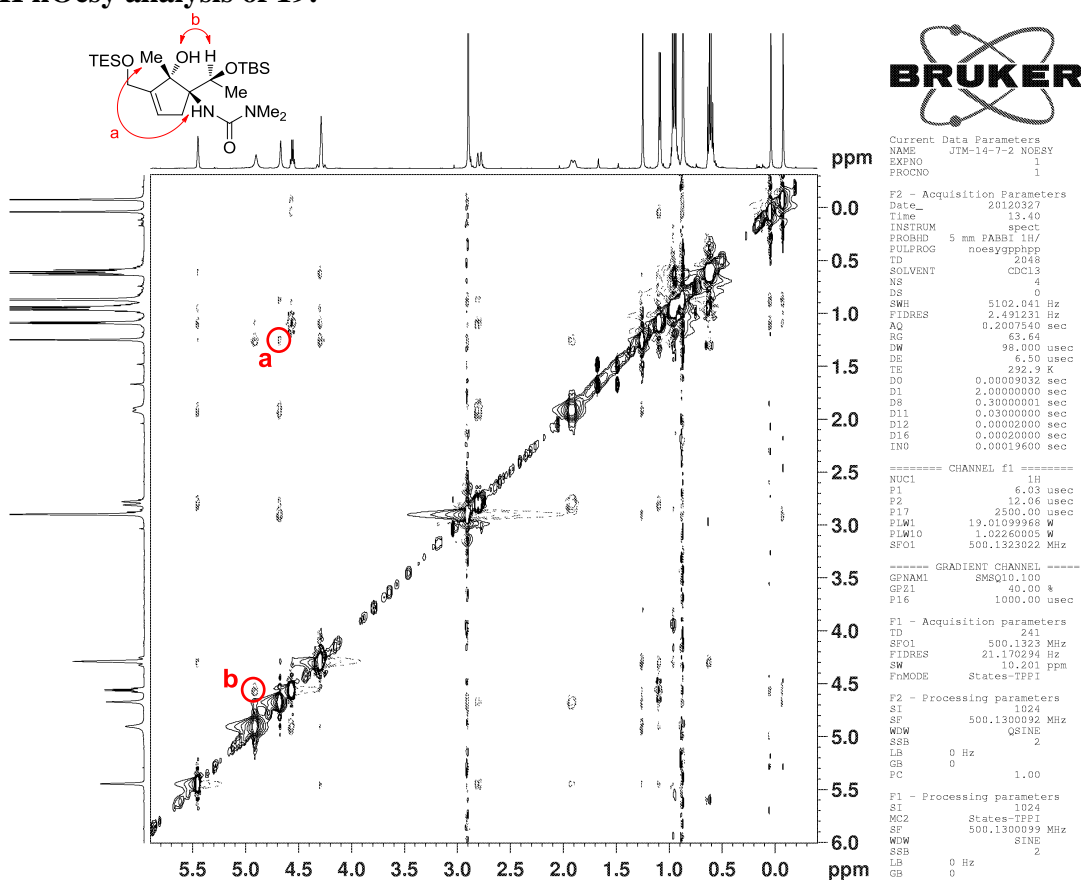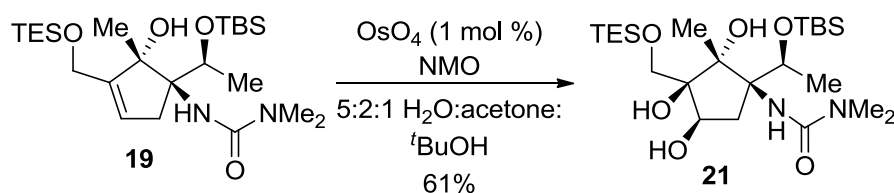

## 3-(1-(1-((tert-butyldimethylsilyl)oxy)ethyl)-2,3,4-trihydroxy-2-methyl-3-

(((triethylsilyl)oxy)methyl)cyclopentyl)-1,1-dimethylurea (**21**): A 20-mL scintillation vial was charged with *N*-methylmorpholine *N*-oxide (0.40 g, 3.45 mmol, 5.00 equiv) and H<sub>2</sub>O (7 mL). <sup>t</sup>BuOH (2 mL) was then added followed by OsO<sub>4</sub> (0.002 g, 0.007 mmol, 0.01 equiv). The mixture was stirred and an acetone solution (3 mL) of cyclopentene **19** (0.336 g, 0.69 mmol, 1.00 equiv) was added. The suspension was stirred vigorously until consumption of starting material was indicated by TLC analysis, typically 24-48 h. Talc (0.5 g) was added followed by Na<sub>2</sub>S<sub>2</sub>O<sub>4</sub> (5 mL). The solids were filtered off and the organics were removed *in vacuo*. The aqueous solution was extracted with CH<sub>2</sub>Cl<sub>2</sub> (3 x 5 mL), washed with brine, dried with magnesium sulfate, and concentrated *in vacuo*. The product was purified via flash chromatography (70:30 hexanes/ethyl acetate) to give the desired product with >20:1 diastomeric ratio as a pale brown oil (0.218 g, 61%). Analytical data: <sup>1</sup>H NMR (400 MHz, CDCl<sub>3</sub>): δ 5.66 (s, 1H), 5.55 (s, 1H), 5.09 (s, 1H), 4.68 (q, *J* = 6.4 Hz, 1H), 4.37-4.31 (m, 1H), 3.75 (d, *J* = 10.0 Hz, 1H), 3.68 (d, *J* =

10.4 Hz, 1H), 3.48 (d,  $J = 9.6$  Hz, 1H), 2.89 (s, 6H), 2.40 (dd,  $J = 14.8, 6.4$  Hz, 1H), 2.17 (dd,  $J = 14.8, 9.2$  Hz, 1H), 1.28 (s, 3H), 1.14 (d,  $J = 6.0$  Hz, 3H), 0.95 (t,  $J = 8.0$  Hz, 9H), 0.87 (s, 9H), 0.62 (q,  $J = 8.0$  Hz, 6H), 0.13 (s, 3H), 0.09 (s, 3H);  $^{13}\text{C}$  NMR (100 MHz,  $\text{CDCl}_3$ ):  $\delta$  158.7, 85.7, 79.6, 71.0, 69.0, 64.1, 37.6, 36.2, 25.9, 19.6, 19.4, 17.8, 6.5, 4.0, -4.2, -4.4; **HRMS** ( $\text{ESI}^+$ ) Calcd. for  $\text{C}_{24}\text{H}_{52}\text{N}_2\text{O}_6\text{Si}_2+\text{Na}$ , 543.3262; Found, 543.3264; **IR** (thin film,  $\text{cm}^{-1}$ ) 3420, 2955, 1628, 1535, 1375, 1253, 1051, 829, 738; **TLC** (60:40 hexanes/EtOAc):  $R_f = 0.40$ .

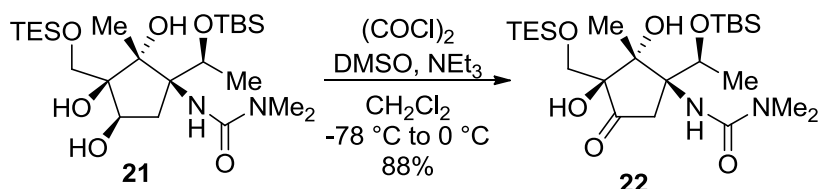

**3-(1-(1-((tert-butyldimethylsilyl)oxy)ethyl)-2,3-dihydroxy-2-methyl-4-oxo-3-**

**(((triethylsilyl)oxy)methyl)cyclopentyl)-1,1-dimethylurea (22):** A flame-dried 20-mL scintillation vial was charged with oxalyl chloride (0.023 mL, 0.265 mmol, 1.20 equiv) and  $\text{CH}_2\text{Cl}_2$  (4 mL). The solution was cooled to  $-78$  °C and DMSO (0.038 mL, 0.528 mmol, 2.40 equiv) was added dropwise. The reaction was stirred for 10 min and a  $\text{CH}_2\text{Cl}_2$  solution (2 mL) of triol **21** (0.115 g, 0.22 mmol, 1.00 equiv) was added. Stirring was continued for 30 min followed by the dropwise addition of triethylamine (0.153 mL, 1.10 mmol, 5.00 equiv). The reaction was allowed to warm slowly in the dry ice/acetone bath until consumption of starting material was indicated by TLC analysis, typically 1-2 h.  $\text{H}_2\text{O}$  was added (5 mL) and the organic layer was extracted with  $\text{Et}_2\text{O}$ , washed with brine, dried with magnesium sulfate, and concentrated *in vacuo*. The product was purified via flash chromatography (60:40 hexanes/ethyl acetate) to give the desired product as a pale brown oil (0.100 g, 88%). Analytical data:  $^1\text{H}$  NMR (400 MHz,  $\text{CDCl}_3$ ):  $\delta$  5.95 (s, 1H), 5.80 (s, 1H), 5.15 (s, 1H), 4.80 (q,  $J = 6.4$  Hz, 1H), 3.97 (d,  $J = 10.4$  Hz, 1H), 3.79 (d,  $J = 10.4$  Hz, 1H), 2.87 (s, 6H), 2.72 (d,  $J = 18.4$  Hz, 1H), 2.24 (d,  $J = 18.4$  Hz, 1H), 1.36 (s, 3H), 1.11 (d,  $J = 6.0$  Hz, 3H), 0.92 (t,  $J = 8.0$  Hz, 9H), 0.90 (s, 9H), 0.60 (q,  $J = 8.0$  Hz, 6H), 0.17 (s, 3H), 0.13 (s, 3H);  $^{13}\text{C}$  NMR (100 MHz,  $\text{CDCl}_3$ ):  $\delta$  213.6, 159.0, 84.0, 78.9, 69.9, 66.2, 64.8, 44.6, 36.2, 25.9, 19.7, 19.7, 17.7, 6.5, 4.0, -4.2; **HRMS** ( $\text{ESI}^+$ ) Calcd. for  $\text{C}_{24}\text{H}_{50}\text{N}_2\text{O}_6\text{Si}_2+\text{Na}$ , 541.3105; Found, 541.3107; **IR** (thin film,  $\text{cm}^{-1}$ ) 3419, 2956, 1752, 1623, 1532, 1265, 1077, 740; **TLC** (60:40 hexanes/EtOAc):  $R_f = 0.50$ .

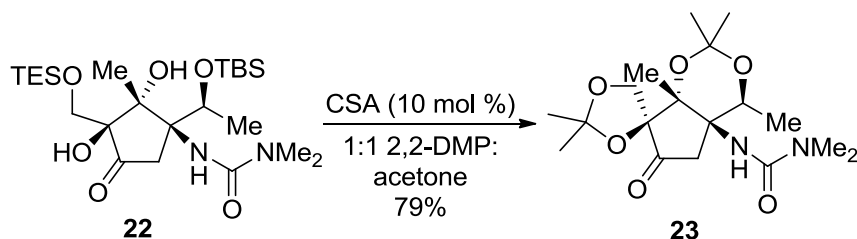

**3-(2,2,2',2',4,7a-hexamethyl-6-oxotetrahydro-4H-spiro[cyclopenta[d][1,3]dioxine-7,4'-**

**[1,3]dioxolan]-4a-yl)-1,1-dimethylurea (23):** A flame-dried 20-mL scintillation vial was charged with diol **22** (0.165 g, 0.318 mmol, 1.00 equiv) and 1:1 acetone/2,2-dimethoxypropane

(6 mL). CSA (0.007 g, 0.032 mmol, 0.10) was added and the vial was capped. The reaction was allowed to stir at rt for 48 h. The solvent was then removed *in vacuo*. The product was purified via flash chromatography (60:40 hexanes/ethyl acetate) to give the desired product as a white solid (0.093 g, 79%). Analytical data: **mp** 137-139 °C;  $^1\text{H NMR}$  (400 MHz,  $\text{CDCl}_3$ ):  $\delta$  5.20 (s, 1H), 4.35 (q,  $J = 6.4$  Hz, 1H), 4.18 (d,  $J = 9.6$  Hz, 1H), 4.11 (d,  $J = 9.6$  Hz, 1H), 3.48 (d,  $J = 20.0$  Hz, 1H), 2.85 (s, 6H), 2.72 (d,  $J = 20.0$  Hz, 1H), 1.59 (s, 3H), 1.44 (s, 3H), 1.43 (s, 3H), 1.39 (d,  $J = 6.4$  Hz, 3H), 1.35 (s, 3H), 1.24 (s, 3H);  $^{13}\text{C NMR}$  (100 MHz,  $\text{CDCl}_3$ ):  $\delta$  212.6, 157.7, 112.1, 99.7, 86.7, 79.9, 73.2, 65.3, 61.0, 47.9, 36.0, 30.6, 26.3, 25.3, 25.1, 18.7, 15.4; **HRMS (ESI<sup>+</sup>)** Calcd. for  $\text{C}_{18}\text{H}_{30}\text{N}_2\text{O}_6+\text{H}$ , 371.2182; Found, 371.2186; **IR** (thin film,  $\text{cm}^{-1}$ ) 3430, 3055, 2988, 1754, 1657, 1523, 1382, 1265, 740; **TLC** (60:40 hexanes/EtOAc):  $R_f = 0.30$ .

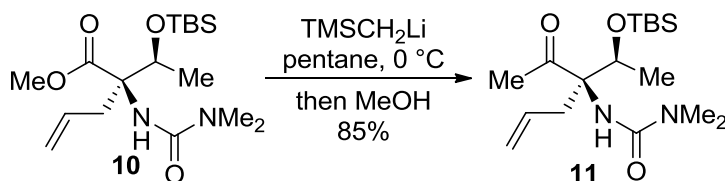

**3-(1-((*tert*-butyldimethylsilyl)oxy)ethyl)-3-((1-(dimethylamino)vinyl)amino)hex-5-en-2-one (11):** A flame-dried 50-mL round-bottomed flask was charged with ester **10** (0.665 g, 1.86 mmol, 1.00 equiv) and pentane (10 mL). The solution was cooled to 0 °C and  $\text{TMSCH}_2\text{Li}$  (1 M, 5.57 mL, 5.57 mmol, 3.00 equiv) was added dropwise. The reaction was stirred until consumption of starting material was indicated by TLC analysis, typically 3 h. MeOH (3 mL) was then added and the reaction was warmed to rt and stirred for 1 h.  $\text{H}_2\text{O}$  (10 mL) was added and the organic layer was extracted with  $\text{Et}_2\text{O}$ , washed with brine, dried with magnesium sulfate, and concentrated *in vacuo*. The product was purified via flash chromatography (90:10 to 70:30 petroleum ether/acetone) to give the desired product as a white solid (0.541 g, 85%). Analytical data: **mp** 41-42 °C;  $^1\text{H NMR}$  (400 MHz,  $\text{CDCl}_3$ ):  $\delta$  5.89 (s, 1H), 5.53-5.42 (m, 1H), 5.02-4.95 (m, 2H), 4.67 (q,  $J = 6.4$  Hz, 1H), 3.33 (dd,  $J = 14.4, 6.8$  Hz, 1H), 2.87 (s, 6H), 2.77 (dd,  $J = 14.4, 8.0$  Hz, 1H), 2.29 (s, 3H), 0.96 (d,  $J = 6.4$  Hz, 3H), 0.89 (s, 9H), 0.15 (s, 3H), 0.07 (s, 3H);  $^{13}\text{C NMR}$  (100 MHz,  $\text{CDCl}_3$ ):  $\delta$  208.5, 156.6, 133.1, 117.9, 71.9, 69.3, 36.1, 34.7, 27.2, 25.8, 18.7, 17.8, -4.4, -4.9; **HRMS (ESI<sup>+</sup>)** Calcd. for  $\text{C}_{17}\text{H}_{34}\text{N}_2\text{O}_3\text{Si}+\text{Na}$ , 365.2237; Found, 365.2245; **IR** (thin film,  $\text{cm}^{-1}$ ) 3412, 2931, 2858, 1656, 1510, 1374, 1257, 1101, 981, 832; **TLC** (70:30 petroleum ether/acetone):  $R_f = 0.60$ .

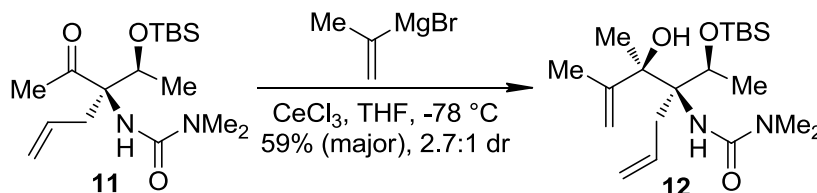

**4-(1-((*tert*-butyldimethylsilyl)oxy)ethyl)-4-((1-(dimethylamino)vinyl)amino)-2,3-dimethylhepta-1,6-dien-3-ol (12):** In a nitrogen-filled glove box a flame-dried 20-mL scintillation vial was charged with cerium trichloride (0.718 g, 2.92 mmol, 5.00 equiv).<sup>1</sup> The vial was capped with a rubber septum and removed from the glove box. THF (8 mL) was added at 0

°C and stirred at that temperature for 3 h. The solution was cooled to -78 °C and isopropenylmagnesium bromide (0.5 M, 5.85 mL, 2.92 mmol, 5.00 equiv) was added. The reaction was stirred for 1 h followed by the addition of a THF solution (2 mL) of ketone **11** (0.200 g, 0.585 mmol, 1.00 equiv). The reaction was then stirred at -78 °C for 5 h. Aqueous acetic acid (0.5 M, 5 mL) was added and the solution was warmed to rt. The organic layer was extracted with Et<sub>2</sub>O, washed with saturated NaHCO<sub>3</sub>, brine, dried with magnesium sulfate, and concentrated *in vacuo*. Crude NMR indicated a 2.7:1 diastomeric ratio. The product was purified via flash chromatography (90:10 to 80:20 hexanes/ethyl acetate) to give the major diastereomer as a colorless oil (0.132 g, 59%). Analytical data: <sup>1</sup>H NMR (500 MHz, CDCl<sub>3</sub>): δ 7.15 (s, 1H), 6.07-5.98 (m, 1H), 5.52 (s, 1H), 5.10 (s, 1H), 5.04 (d, *J* = 6.0 Hz, 1H), 5.02 (s, 1H), 4.87 (s, 1H), 4.40 (q, *J* = 6.0 Hz, 1H), 2.94 (dd, *J* = 14.5, 10.0 Hz, 1H), 2.84 (s, 6H), 2.51 (dd, *J* = 15.0, 5.0 Hz, 1H), 1.87 (s, 3H), 1.34 (s, 3H), 1.32 (d, *J* = 6.0 Hz, 3H), 0.88 (s, 9H), 0.09 (s, 3H), 0.02 (s, 3H); <sup>13</sup>C NMR (125 MHz, CDCl<sub>3</sub>): δ 159.1, 150.1, 136.7, 117.4, 113.8, 79.1, 70.8, 66.7, 36.6, 34.2, 25.9, 25.6, 21.9, 21.0, 18.0, -4.4, -4.4; HRMS (ESI<sup>+</sup>) Calcd. for C<sub>20</sub>H<sub>40</sub>N<sub>2</sub>O<sub>3</sub>Si+Na, 407.2706; Found, 407.2717; IR (thin film, cm<sup>-1</sup>) 3403, 3055, 1631, 1422, 1265, 1070, 739; TLC (70:30 petroleum ether/acetone): R<sub>f</sub> = 0.70.

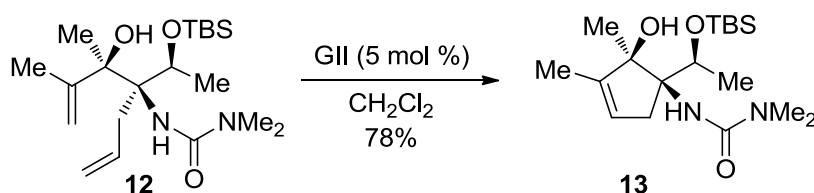

**2-(1-((*tert*-butyldimethylsilyl)oxy)ethyl)-2-((1-(dimethylamino)vinyl)amino)-1,5-dimethylcyclopentanol (**13**):**

In a nitrogen-filled glove box a flame-dried 20-mL scintillation vial was charged with Grubbs's second generation catalyst (0.003 g, 0.003 mmol, 0.05 equiv). The vial was capped with a rubber septum and removed from the glove box. CH<sub>2</sub>Cl<sub>2</sub> (3 mL) was added followed by a CH<sub>2</sub>Cl<sub>2</sub> solution (2 mL) of diene **12** (0.02 g, 0.052 mmol, 1.00 equiv). The reaction stirred for 6 h under a nitrogen atmosphere. The reaction was then concentrated *in vacuo*. The product was purified via flash chromatography (75:25 hexanes/ethyl acetate to 70:30 petroleum ether/acetone) to give the desired product as a white solid (0.014 g, 78%). Analytical data: mp 143-146 °C; <sup>1</sup>H NMR (400 MHz, CDCl<sub>3</sub>): δ 5.62 (s, 1H), 5.28 (s, 1H), 4.32 (q, *J* = 6.4 Hz, 1H), 3.53 (d, *J* = 16.0 Hz, 1H), 2.88 (s, 6H), 2.54 (s, 1H), 2.03 (d, *J* = 16.0 Hz, 1H), 1.66 (s, 3H), 1.33 (s, 3H), 1.26 (d, *J* = 6.4 Hz, 3H), 0.89 (s, 9H), 0.11 (s, 6H); <sup>13</sup>C NMR (100 MHz, CDCl<sub>3</sub>): δ 158.5, 143.5, 122.4, 86.4, 72.6, 71.0, 36.3, 33.8, 26.0, 21.7, 20.1, 18.0, 11.7, -3.1, -4.5; HRMS (ESI<sup>+</sup>) Calcd. for C<sub>18</sub>H<sub>36</sub>N<sub>2</sub>O<sub>3</sub>Si+H, 357.2573; Found, 357.2575; IR (thin film, cm<sup>-1</sup>) 3315, 3054, 2931, 2857, 2305, 1613, 1520, 1265, 1172, 739; TLC (70:30 petroleum ether/acetone): R<sub>f</sub> = 0.60.

# <sup>1</sup>H nOesy analysis of 13:

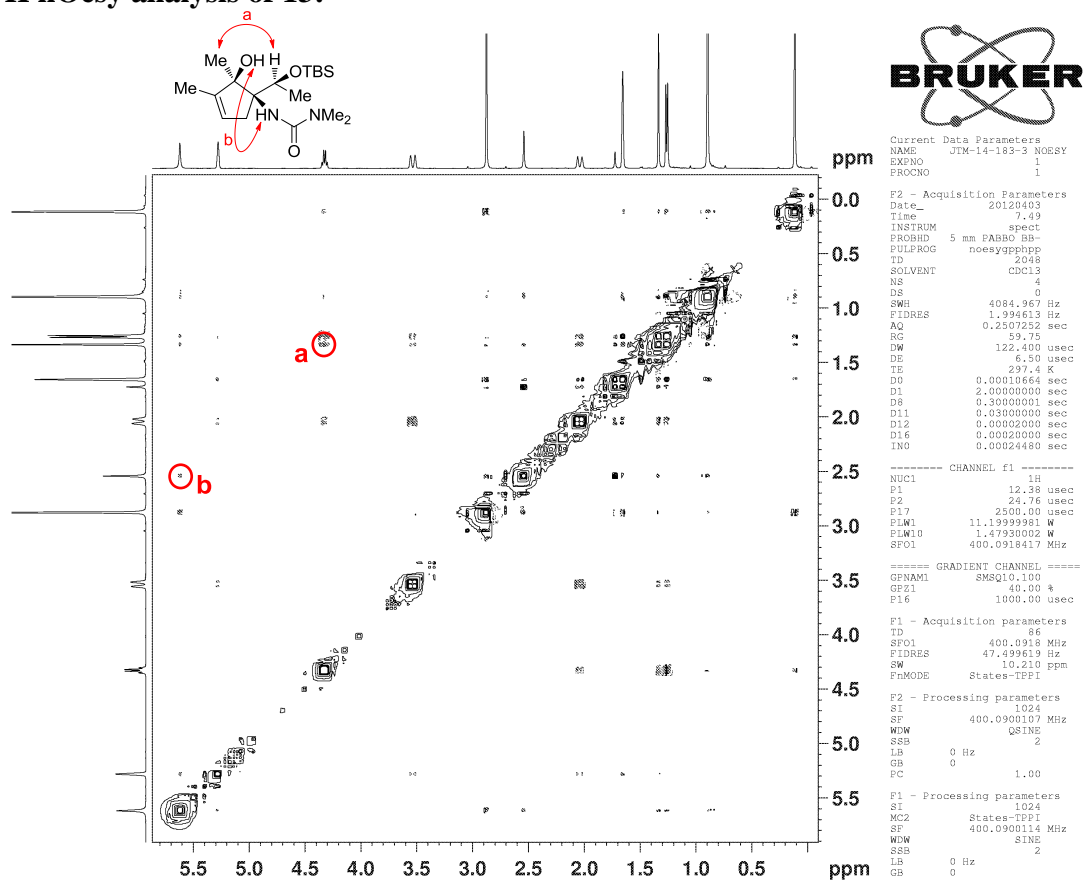

## Preparation of Enantioenriched (*R*)-9:

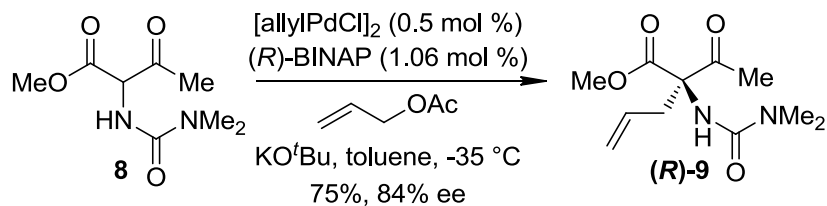

**(*R*)-methyl 2-acetyl-2-(3,3-dimethylureido)pent-4-enoate ((*R*)-9):** In a nitrogen-filled glove box a flame-dried 4-mL vial was charged with allylpalladium chloride dimer (0.001 g, 0.002 mmol, 0.005 equiv) and (*R*)-BINAP (0.003 g, 0.005 mmol, 0.0106 equiv). Toluene (0.5 mL) was added and the suspension was stirred for 10 min, capped with a rubber septum, and removed from the glove box. Allyl acetate (0.056 mL, 0.52 mmol, 1.10 equiv) was added and the catalyst solution was stirred for an additional 10 min. A separate flame-dried 20-mL scintillation vial was charged with **8** (0.095 g, 0.47 mmol, 1.00 equiv) and KO<sup>t</sup>Bu (0.055 g, 0.49 mmol, 1.05 equiv). Toluene (1.5 mL) was added and the suspension was stirred under a nitrogen atmosphere at -35 °C. The catalyst solution was introduced via cannula transfer, and the reaction was stirred for 24 h at -35 °C. The reaction was quenched with 1 M HCl (1 mL), and extracted with EtOAc (2 x 5 mL). The combined organic extracts were washed with brine, dried with magnesium sulfate, and concentrated *in vacuo*. The product was purified via flash chromatography (80:20 to 70:30 petroleum ether/acetone) to give the desired product as a colorless oil (0.085 g, 75%, e.r. 92:8). The enantiomer ratio was determined by SFC analysis (Chiralcel, OD, 2.0% MeOH, 1.5 mL/min, 150 bar, 210 nm; *t*<sub>R</sub>-minor 8.5 min, *t*<sub>R</sub>-major 9.9 min).

## SFC Trace:

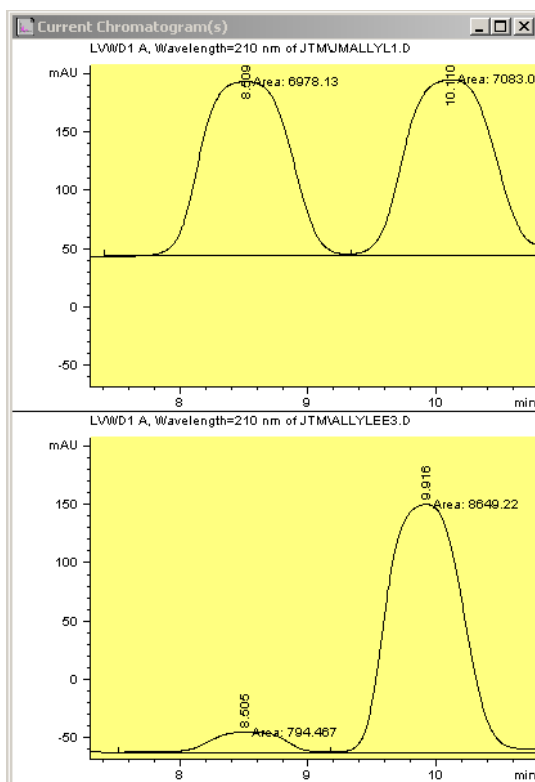

# $^1\text{H}$ , $^{13}\text{C}$ NMR Spectra:

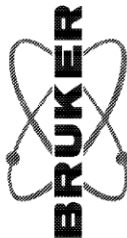

Current Data Parameters  
NAME JTM-CHAR-Urea 1H  
EXPNO 1  
PROCNO 1

### F2 - Acquisition Parameters

Date\_ 20110128  
Time 15.23  
INSTRUM spect  
PROBHD 5 mm CPQNP 1H/  
PULPROG zg30  
TD 65536  
SOLVENT CDCl3  
NS 7  
DS 0  
SWH 12335.526 Hz  
FIDRES 0.188225 Hz  
AQ 2.6564426 sec  
RG 32  
DW 40.533 usec  
DE 10.00 usec  
TE 300.0 K  
D1 1.00000000 sec

===== CHANNEL f1 =====  
NUC1 1H  
P1 13.50 usec  
PLW1 9.8999962 W  
SFO1 600.1337060 MHz

F2 - Processing parameters  
SI 65536  
SF 600.1300153 MHz  
WDW EM  
SSB 0  
LB 0.30 Hz  
GB 0  
PC 1.00

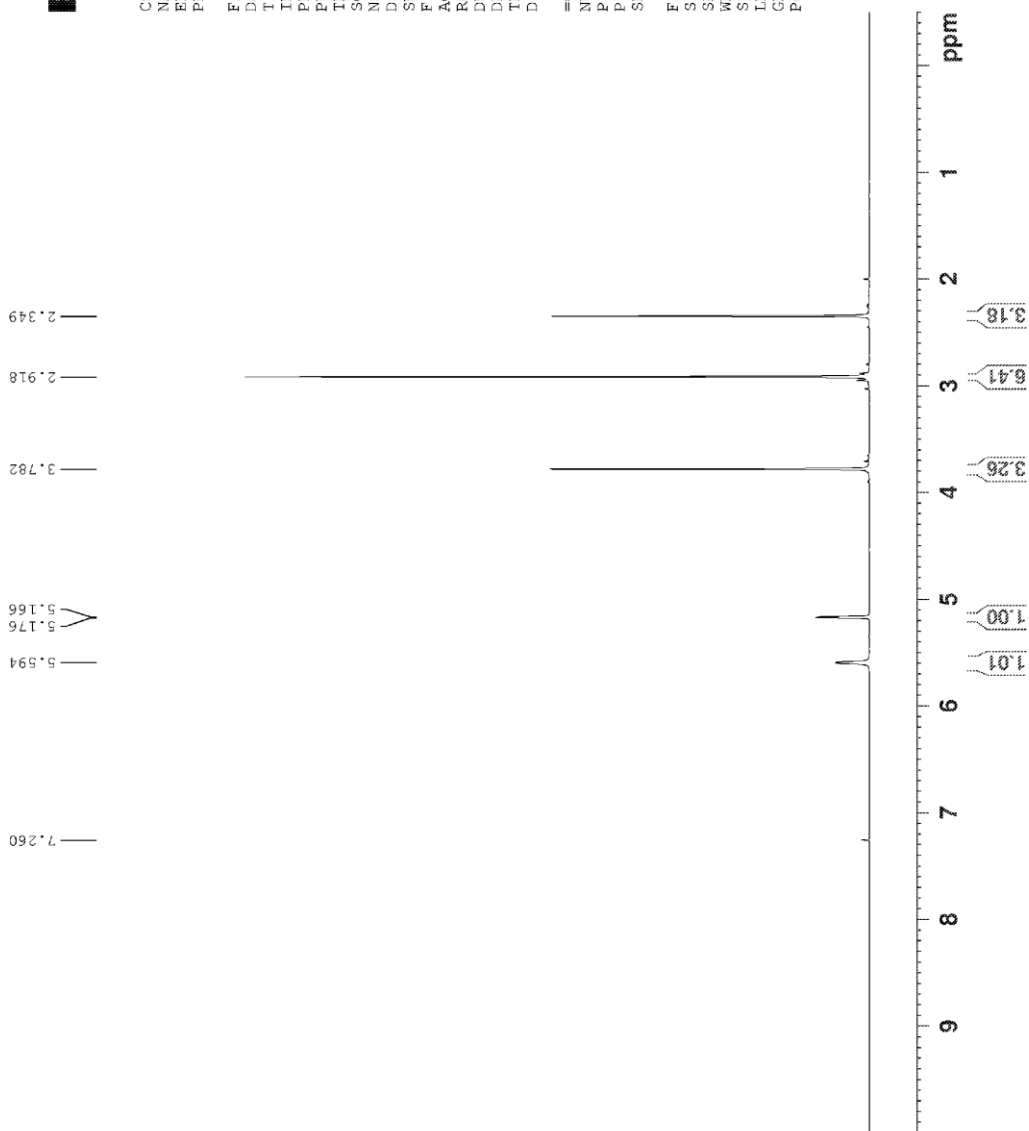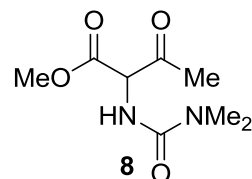

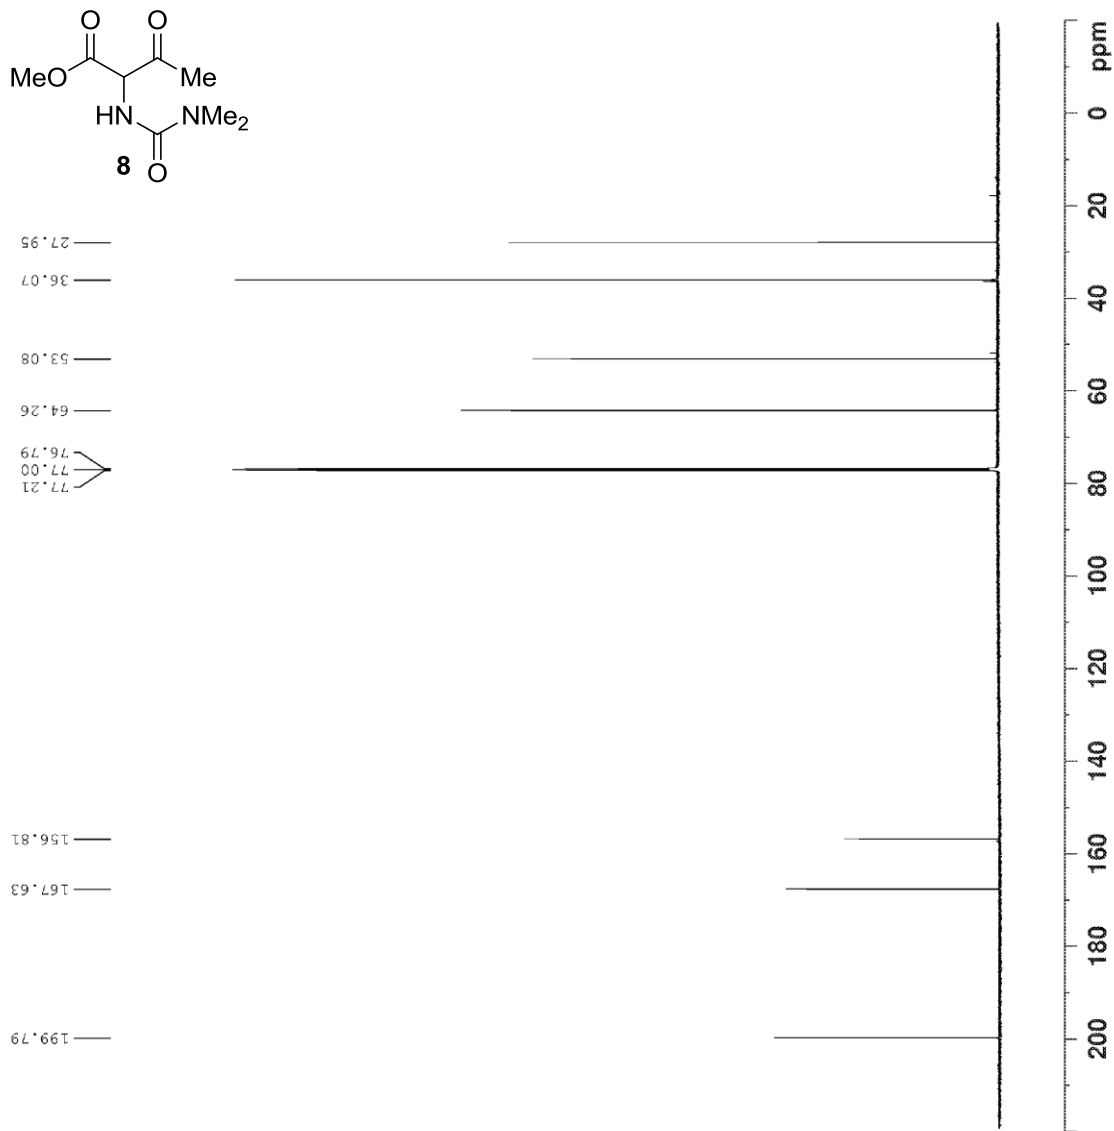

Current Data Parameters  
 NAME JTM-CHAR-Urea 13  
 EXPNO 1  
 PROCNO 1

F2 - Acquisition Parameters  
 Date\_ 20110128  
 Time 15.26  
 INSTRUM spect  
 PROBHD 5 mm CPQNP 1H/  
 PULPROG zgpg30  
 TD 65536  
 SOLVENT CDCl<sub>3</sub>  
 NS 68  
 DS 0  
 SWH 36057.691 H  
 FIDRES 0.550197 H  
 AQ 0.9088159 s  
 RG 203  
 DW 13.867 u  
 DE 18.00 u  
 TE 300.0 K  
 D1 2.00000000 s  
 D11 0.03000000 s

==== CHANNEL f1 =====  
 NUC1 <sup>13</sup>C  
 P1 10.12 u  
 PLW1 33.00000000 W  
 SFO1 150.9178981 M

==== CHANNEL f2 =====  
 CPDPRG2 waltz16  
 NUC2 <sup>1</sup>H  
 PCPD2 80.00 u  
 PLW2 9.89999962 W  
 PLW12 2.50000000 W  
 PLW13 0.18043000 W  
 SFO2 600.1324005 M

F2 - Processing parameter  
 SI 32768  
 SF 150.9028228 M  
 WDW EM  
 SSB 0  
 LB 1.00 H  
 GB 0  
 PC 1.40



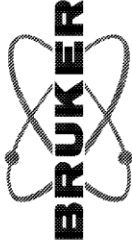

Current Data Parameters  
NAME JTM-CHAR-Allyl 1H  
EXPNO 1  
PROCNO 1

F2 - Acquisition Parameters  
Date\_ 20110128  
Time 15.31  
INSTRUM spect  
PROBHD 5 mm CPQNP 1H/  
PULPROG zg30  
TD 65536  
SOLVENT CDCl3  
NS 10  
DS 0  
SWH 12335.526 Hz  
FIDRES 0.188225 Hz  
AQ 2.6564426 sec  
RG 32  
DW 40.533 usec  
DE 10.00 usec  
TE 300.2 K  
D1 1.00000000 sec

==== CHANNEL f1 =====  
NUC1 1H  
P1 13.50 usec  
PL1 9.89999962 W  
SFO1 600.1337060 MHz

F2 - Processing parameters  
SI 65536  
SF 600.1300153 MHz  
WDW EM  
SSB 0  
IB 0.30 Hz  
GB 0  
PC 1.00

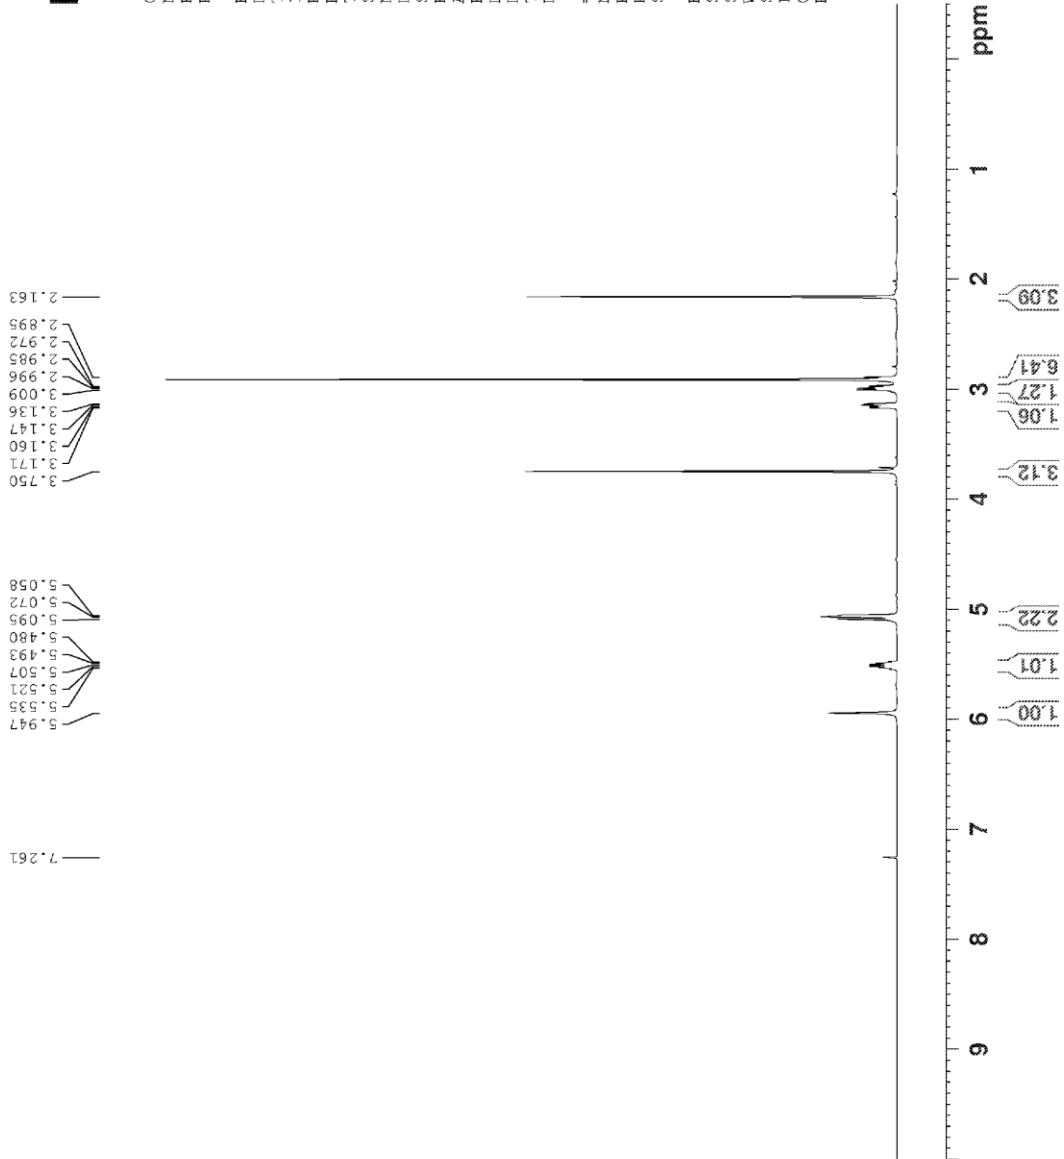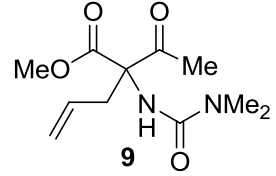

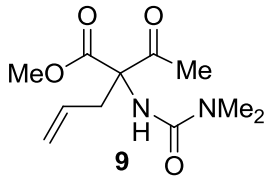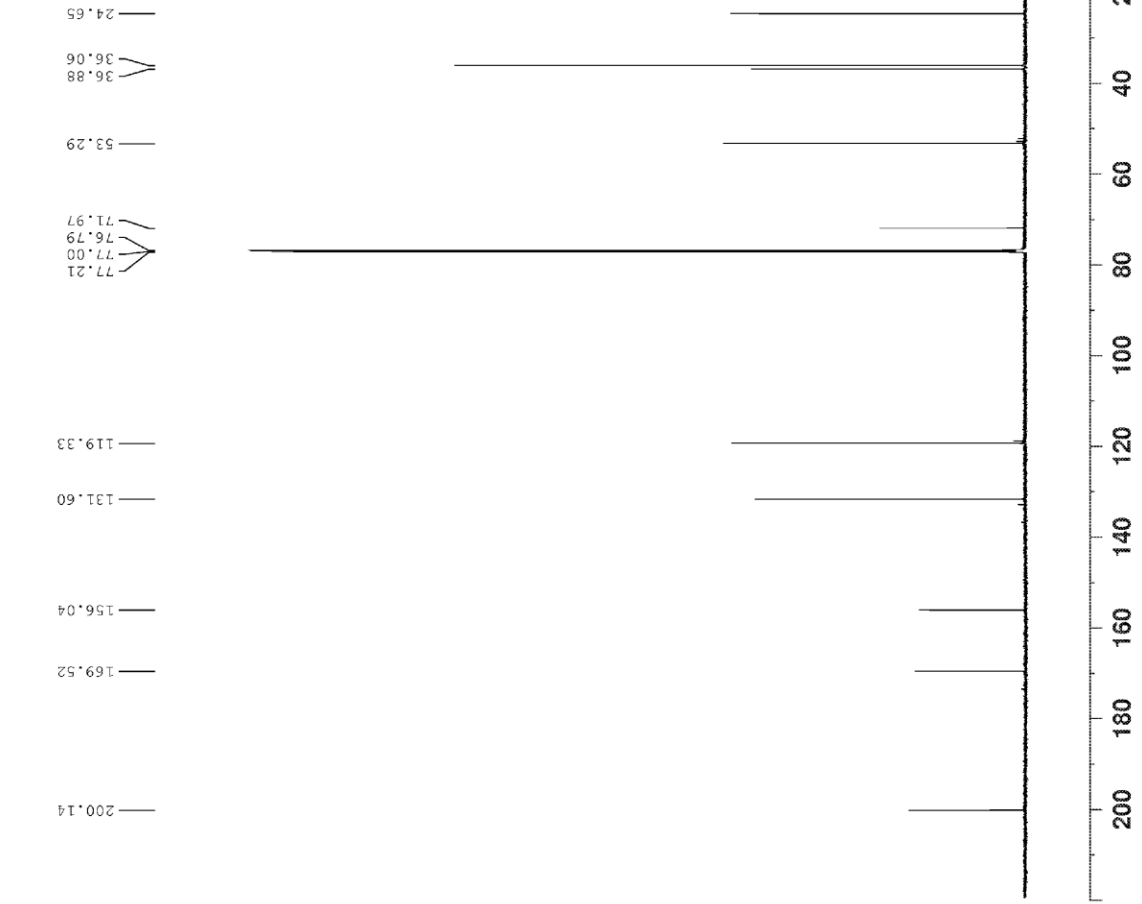

Current Data Parameters  
 NAME JTM-CHAR-ALLYL 1  
 EXPNO 1  
 PROCNO 1

F2 - Acquisition Parameters  
 Date\_ 20110128  
 Time 15.34  
 INSTRUM spect  
 PROBHD 5 mm CPQNP 1H/  
 PULPROG zgpg30  
 ID 65536  
 SOLVENT CDCl3  
 NS 46  
 DS 0  
 SWH 36057.691 H  
 FIDRES 0.350197 H  
 AQ 0.9088159 s  
 RG 203  
 DM 13.867 u  
 DE 18.00 u  
 TE 300.0 K  
 D1 2.0000000 s  
 D11 0.0300000 s

==== CHANNEL f1 ====  
 NUC1 13C  
 P1 10.12 u  
 PLW1 33.0000000 W  
 SF01 150.9178981 M

==== CHANNEL f2 ====  
 CPDPRG2 waltz16  
 NUC2 1H  
 PCPD2 80.00 u  
 PLW2 9.8999962 W  
 PLW12 2.5000000 W  
 PLW13 0.1804300 W  
 SFO2 600.1324005 M

F2 - Processing parameters  
 SI 32768  
 SF 150.9028184 M  
 WDW EM  
 SSB 0  
 LB 1.00 H  
 GB 0  
 PC 1.40

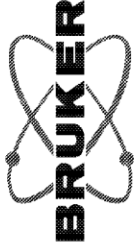

Current Data Parameters  
NAME JTM-CHAR-Alcohol Major  
EXPNO 1  
PROCNO 1

F2 - Acquisition Parameters

Date\_ 20110201  
Time 9.42  
INSTRUM spect  
PROBHD 5 mm CPQNP 1H/  
PULPROG zg30  
TD 65536  
SOLVENT CDCl3  
NS 16  
DS 0  
SWH 12335.526 Hz  
FIDRES 0.188225 Hz  
AQ 2.656426 sec  
RG 32  
DW 40.533 usec  
DE 10.00 usec  
TE 300.5 K  
D1 1.00000000 sec

==== CHANNEL f1 =====  
NUC1 1H  
P1 13.50 usec  
PL1 9.899992 W  
SFO1 600.1337060 MHz

F2 - Processing parameters

SF 600.1300154 MHz  
WDW EM  
SSB 0  
LB 0  
GB 0  
FC 1.00

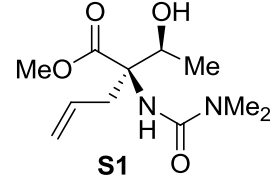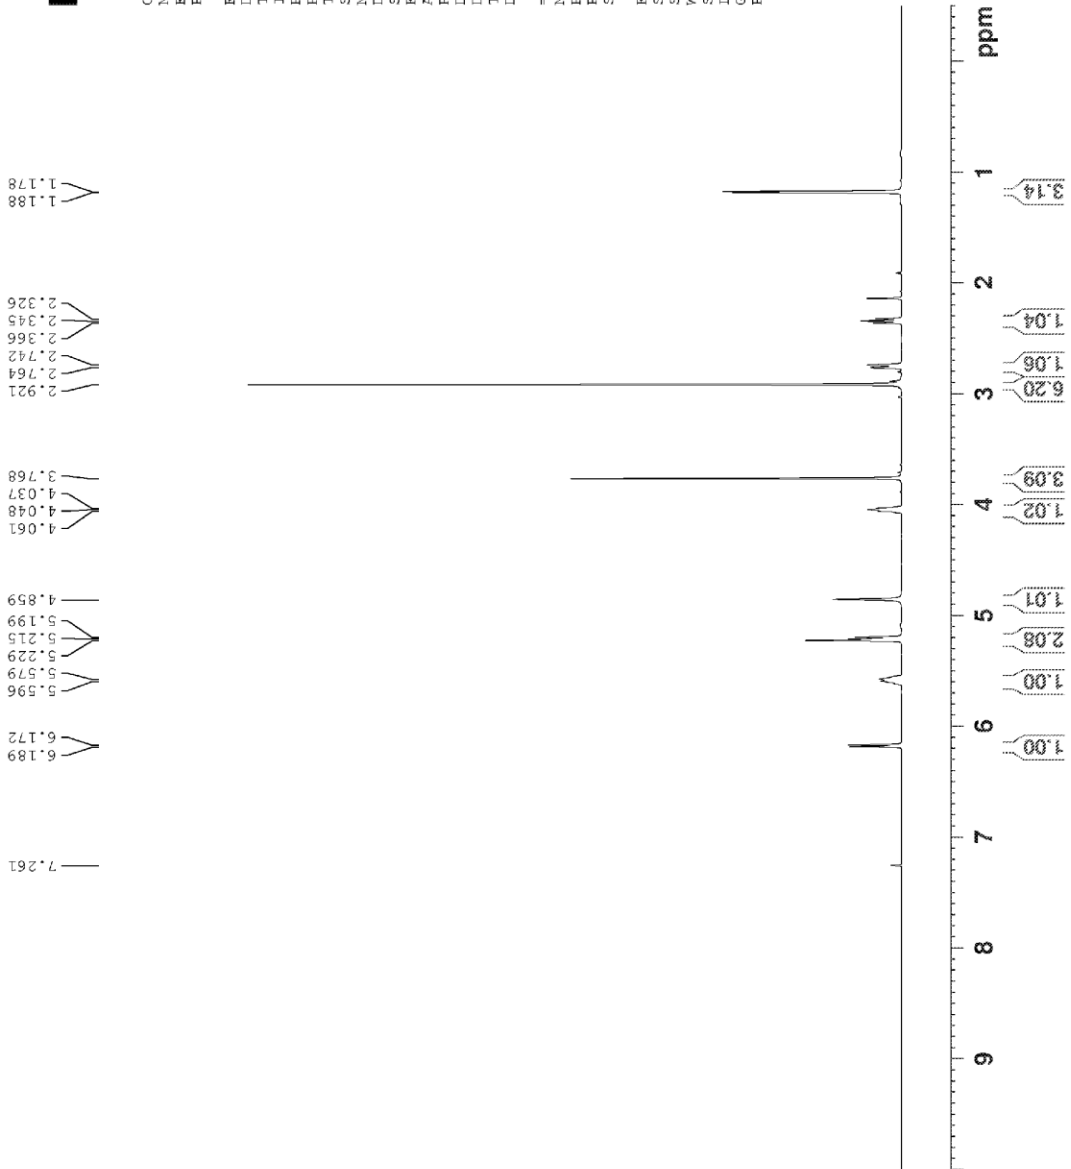

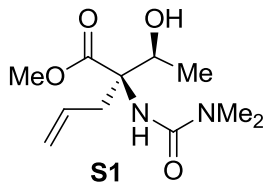

Current Data Parameters  
 NAME JTM-CHAR-Alcohol Ma.jc  
 EXPNO 1  
 PROCNO 1

F2 - Acquisition Parameters

Date\_ 20110201  
 Time 9.49  
 INSTRUM spect  
 PROBHD 5 mm CPNP 1H/  
 PULPROG zgpg30  
 TD 6536  
 SOLVENT CDCl3  
 NS 10  
 DS 4  
 SWH 36057.691 Hz  
 FIDRES 0.550197 Hz  
 AQ 0.9088159 sec  
 RG 203  
 DW 13.867 usec  
 DE 18.00 usec  
 TE 300.0 K  
 D1 2.0000000 sec  
 D11 0.0300000 sec

===== CHANNEL f1 =====  
 NUC1 13C  
 P1 10.12 usec  
 PLW1 33.0000000 W  
 SF01 150.9178981 MHz

===== CHANNEL f2 =====  
 CPDPRG2 waltz16  
 NUC2 1H  
 PCPD2 80.00 usec  
 PLW2 9.8999962 W  
 PLW12 2.5000000 W  
 PLW13 0.18043000 W  
 SF02 600.1324005 MHz

F2 - Processing parameters  
 SI 32768  
 SF 150.9028211 MHz  
 EM  
 SSB 0  
 LB 1.00 Hz  
 GB 0  
 PC 1.40

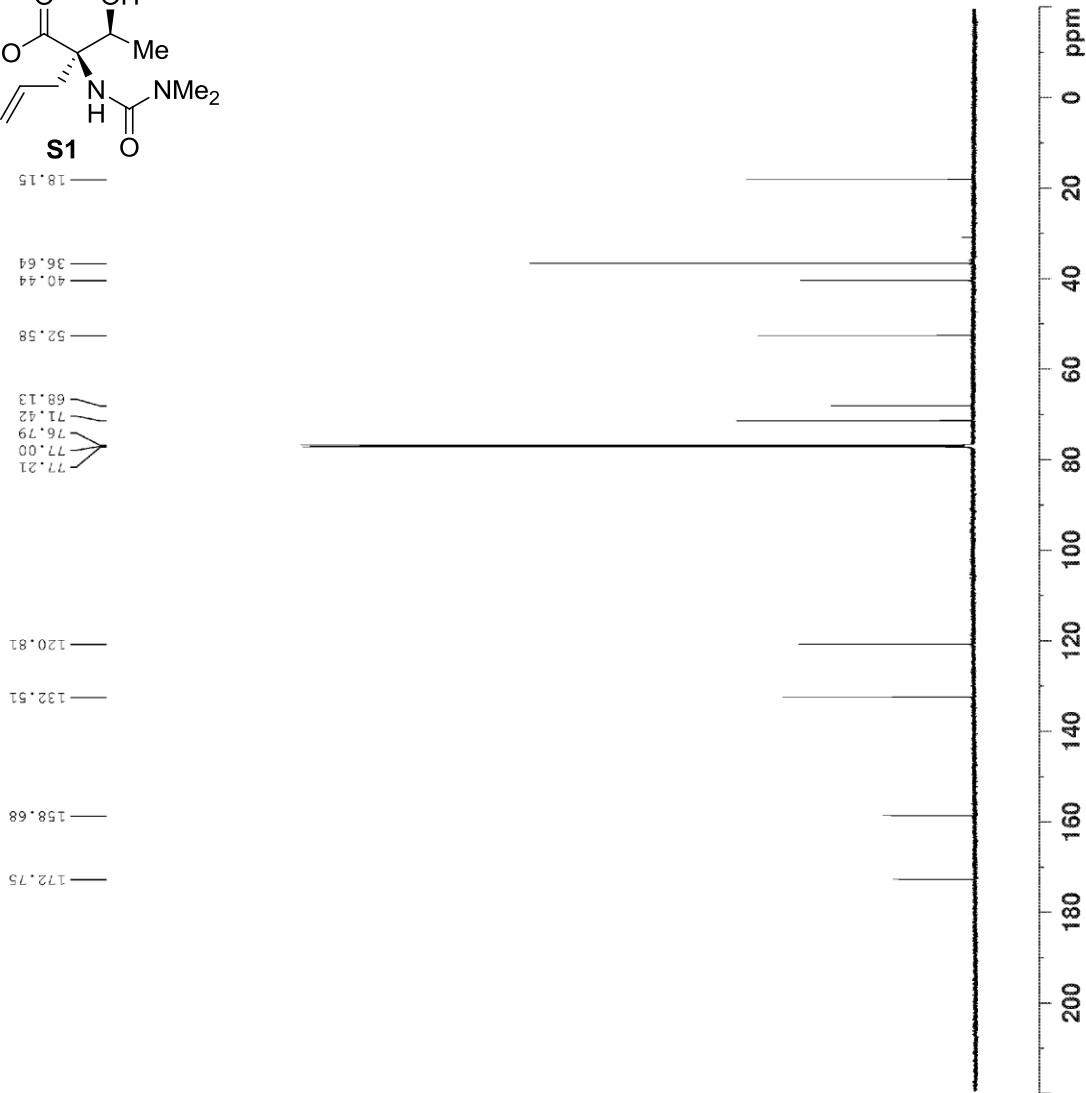

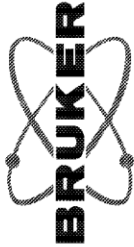

Current Data Parameters  
NAME JTM-CHAR-TBSO 1H  
EXPNO 1  
PROCNO 1

F2 - Acquisition Parameters  
Date\_ 20110128  
Time 15.41  
INSTRUM spect  
PROBHD 5 mm CPQNP 1H/  
PULPROG zg30  
TD 65536  
SOLVENT CDCl3  
NS 8  
DS 0  
SWH 12335.526 Hz  
FIDRES 0.188225 Hz  
AQ 2.6564426 sec  
RG 16  
DW 40.533 usec  
DE 10.00 usec  
TE 300.1 K  
D1 1.00000000 sec

==== CHANNEL f1 =====  
NUC1 1H  
P1 13.50 usec  
PL1 9.89999962 W  
SFO1 600.1337060 MHz

F2 - Processing parameters  
SI 65536  
SF 600.1300163 MHz  
WDW EM  
SSB 0  
LB 0.30 Hz  
GB 0  
PC 1.00

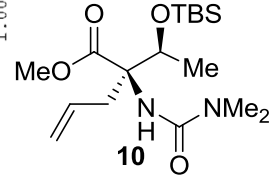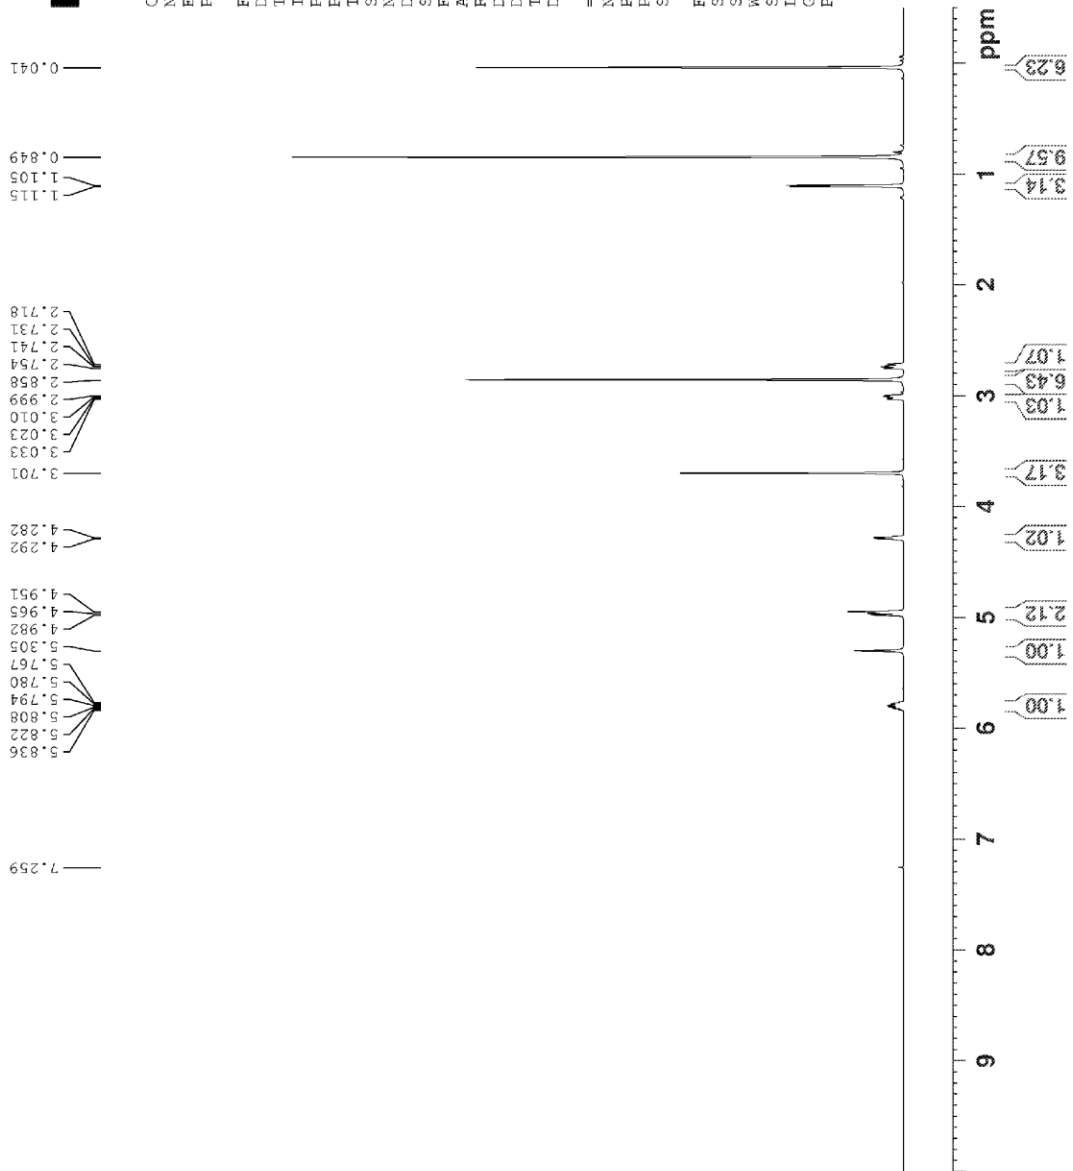

Current Data Parameters  
 NAME JTM-CHAR-IBSO\_13  
 EXPNO 1  
 PROCNO 1

F2 - Acquisition Parameter  
 Date\_ 20110128  
 Time 15.44  
 INSTRUM spect  
 PROBHD 5 mm CPQNP 1H/  
 PULPROG zgpg30  
 TD 65536  
 SOLVENT CDCl3  
 NS 48  
 DS 0  
 SMH 36057.691 H  
 FIDRES 0.350197 H  
 AQ 0.9088159 S  
 RG 203  
 DW 13.867 u  
 DE 18.00 u  
 TE 300.0 K  
 D1 2.0000000 S  
 D11 0.0300000 S

==== CHANNEL f1 =====  
 NUC1 13C  
 P1 10.12 u  
 PLW1 33.0000000 W  
 SF01 150.9178981 M

==== CHANNEL f2 =====  
 CPDPRG2 waltz16  
 NUC2 1H  
 PCPD2 80.00 u  
 PLW2 9.8999962 W  
 PLW12 2.5000000 W  
 PLW13 0.1804300 W  
 SFO2 600.1324005 M

F2 - Processing parameter  
 SI 32768  
 SF 150.9028205 M  
 WDW EM  
 SSB 0  
 LB 1.00 H  
 GB 0  
 PC 1.40

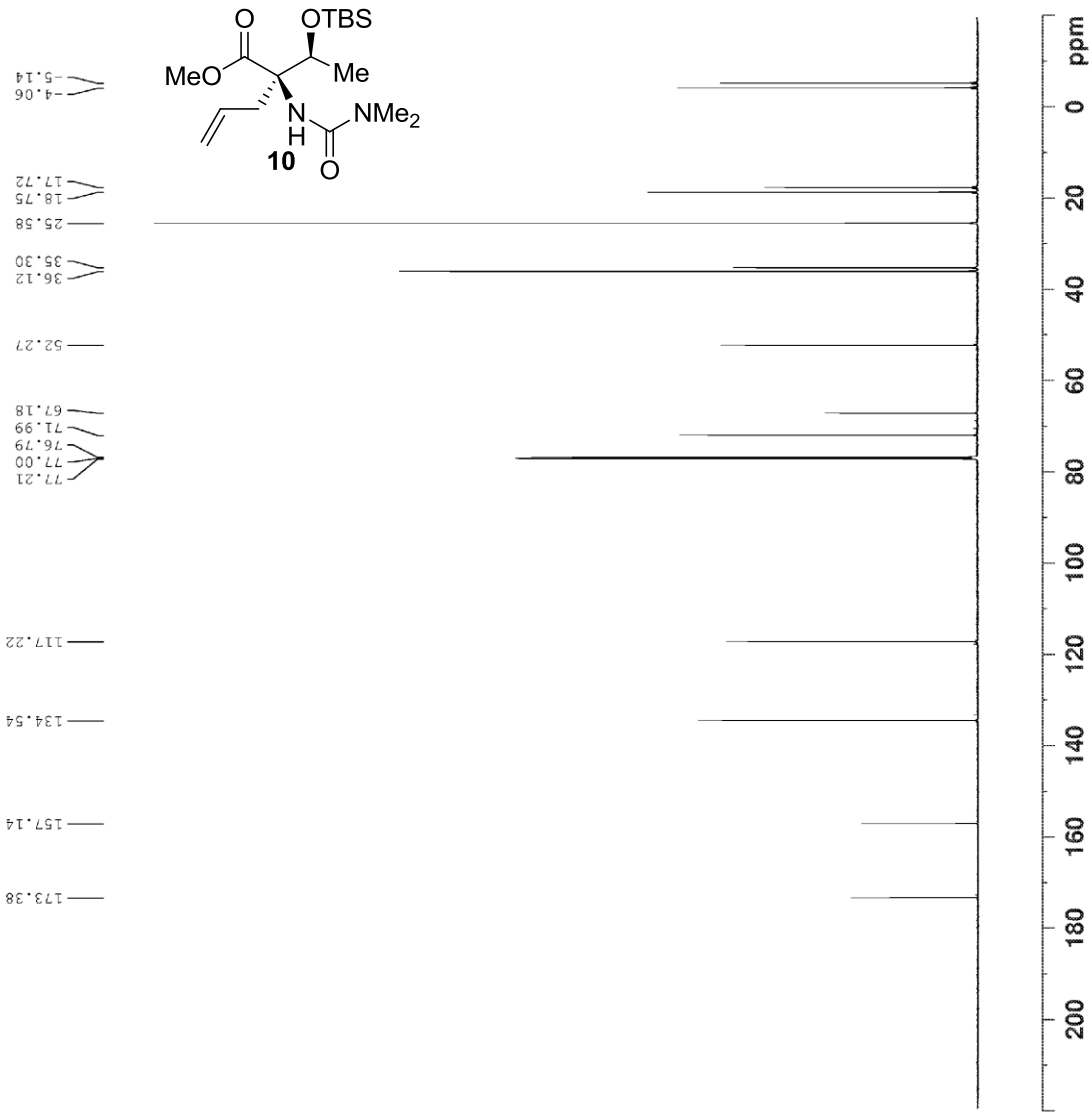

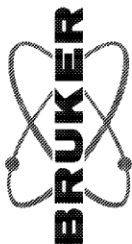

Current Data Parameters  
NAME JTM-CHAR-Ald 1H  
EXPNO 1  
PROCNO 1

F2 - Acquisition Parameters  
Date\_ 20110207  
Time 8.32  
INSTRUM spect  
PROBHD 5 mm CPQNP 1H/  
PULPROG zg30  
TD 65536  
SOLVENT CDCl3  
NS 9  
DS 0  
SWH 12335.526 Hz  
FIDRES 0.188225 Hz  
AQ 2.6564426 sec  
RG 57  
DW 40.533 usec  
DE 10.00 usec  
TE 300.1 K  
D1 1.00000000 sec

===== CHANNEL f1 =====  
NUC1 1H  
P1 13.50 usec  
PLW1 9.89999962 W  
SF01 600.1337060 MHz  
F2 - Processing parameters  
SI 65536  
SF 600.1300171 MHz  
WDW EM  
SSB 0  
LB 0.30 Hz  
GB 0  
PC 1.00

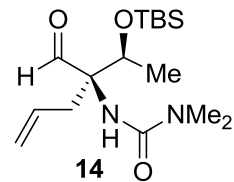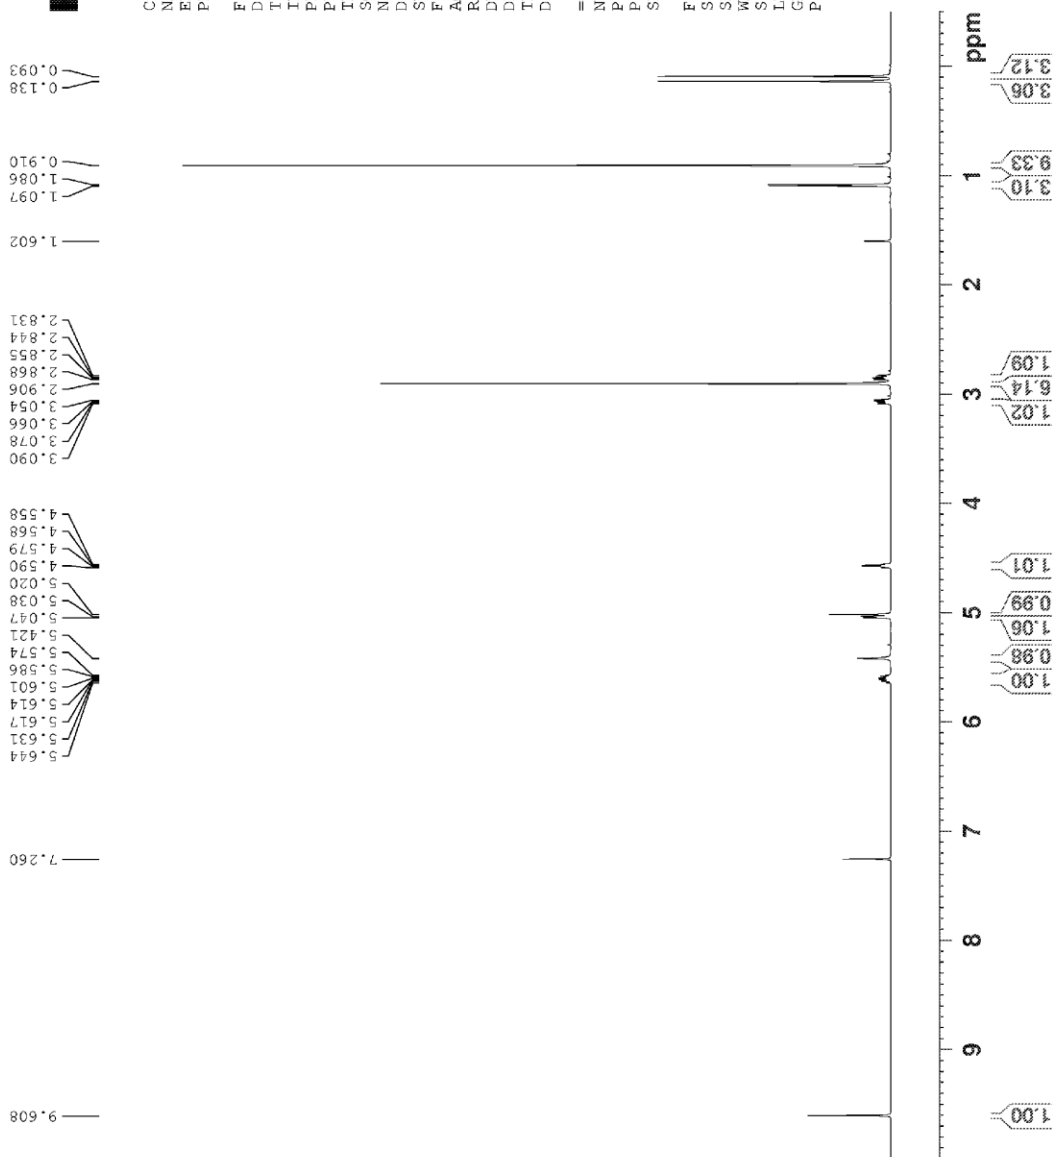

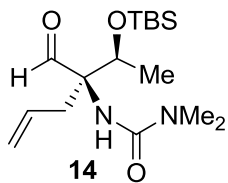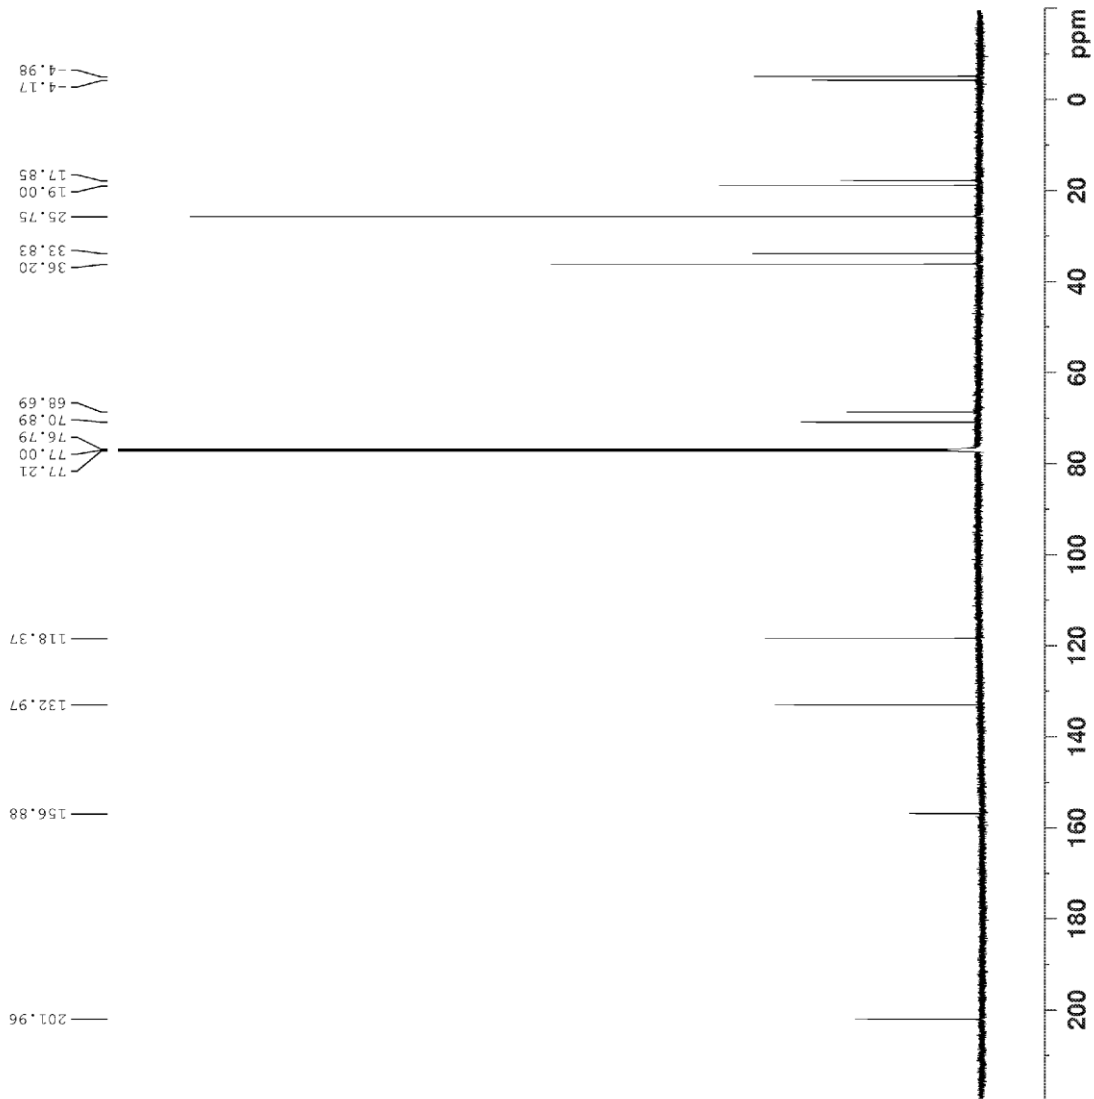



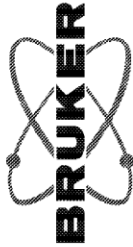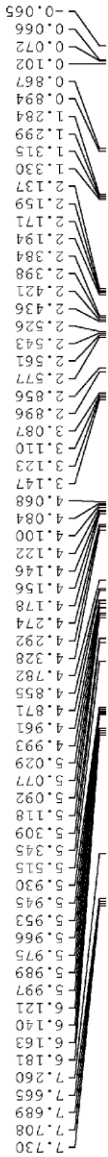

Current Data Parameters  
 NAME JTM-14-addition  
 EXPNO 1  
 PROCNO 1

F2 - Acquisition Parameters  
 Date\_ 20120402  
 Time 15.36  
 INSTRUM spect  
 PROBHD 5 mm PABEO BB-  
 PULPROG zg30  
 TD 65536  
 SOLVENT CDCl3  
 NS 15  
 DS 0  
 SWH 8223.685 Hz  
 FIDRES 0.125483 Hz  
 AQ 3.9846387 sec  
 RG 71.37  
 DW 60.800 usec  
 DE 6.50 usec  
 TE 297.0 K  
 D1 1.00000000 sec  
 TD0 1

==== CHANNEL f1 =====  
 NUC1 1H  
 PI 12.38 usec  
 PLW1 11.1999981 W  
 SFO1 400.0924707 MHz  
 F2 - Processing parameters  
 SI 65536  
 SF 400.0900113 MHz  
 WDW EM  
 SSB 0  
 LB 0.30 Hz  
 GB 0  
 PC 1.00

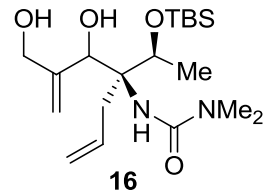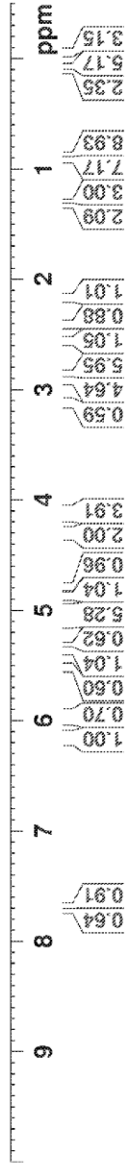

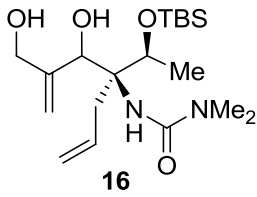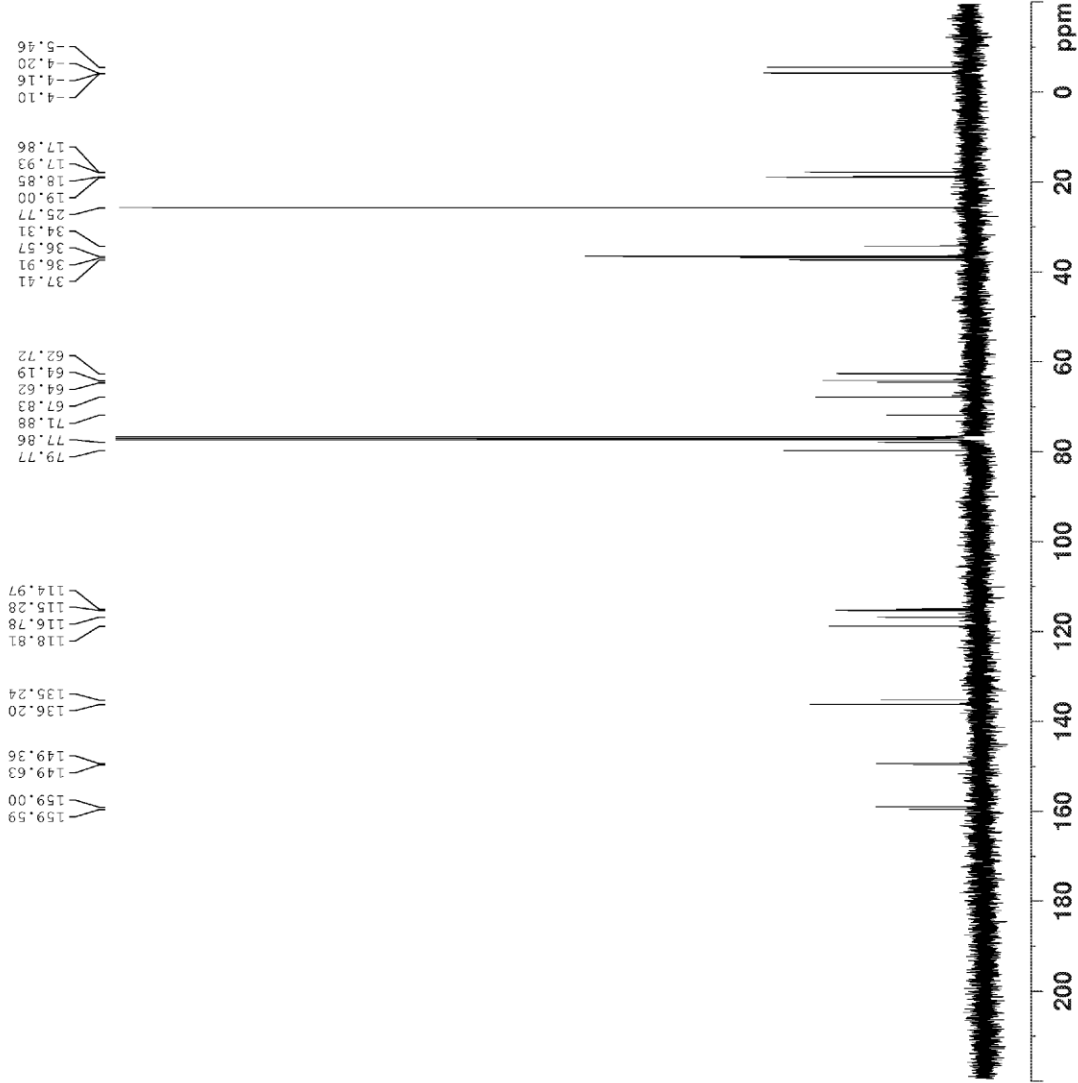

Current Data Parameters  
 NAME JTM-14-addition 1  
 EXPNO 1  
 PROCNO 1

F2 - Acquisition Parameters  
 Date\_ 20120402  
 Time 15.39  
 INSTRUM spect  
 PROBHD 5 mm PABEO BB-  
 PULPROG zgpg30  
 TD 65536  
 SOLVENT CDCl3  
 NS 232  
 DS 0  
 SWH 24038.461 Hz  
 FIDRES 0.366798 Hz  
 AQ 1.36631988 sec  
 RG 200.09  
 DW 20.800 us  
 DE 6.50 us  
 TE 297.1 K  
 D1 2.00000000 sec  
 D11 0.03000000 sec  
 TD0 1

==== CHANNEL f1 =====  
 NUC1 13C  
 P1 7.50 us  
 PLW1 61.20000076 W  
 SFO1 100.6127703 MHz

==== CHANNEL f2 =====  
 CPDPRG2 waltz16  
 NUC2 1H  
 P2 80.00 us  
 PLW2 11.19999981 W  
 PLW12 0.26820999 W  
 PLW13 0.17166001 W  
 SFO2 400.0916004 MHz

F2 - Processing parameters  
 SI 32768  
 SF 100.6027149 MHz  
 WDW EM  
 SSB 0  
 LB 1.00 Hz  
 GB 0  
 PC 1.40

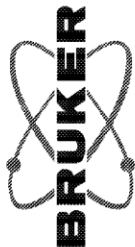

Current Data Parameters  
NAME JTM-14-159-2 1H  
EXPNO 1  
PROCNO 1

F2 - Acquisition Parameters  
Date\_ 20120329  
Time 10.56  
INSTRUM spect  
PROBHD 5 mm PABBI 1H/  
PULPROG zg30  
TD 65536  
SOLVENT CDCl3  
NS 17  
DS 0  
SWH 10330.578 Hz  
FIDRES 0.157632 Hz  
AQ 3.1719923 sec  
RG 30.89  
DW 48.400 usec  
DE 6.50 usec  
TE 292.8 K  
D1 1.00000000 sec  
TD0 1

==== CHANNEL f1 =====  
NUC1 1H  
PI 6.03 usec  
PLW1 19.01099968 W  
SFO1 500.1330885 MHz  
F2 - Processing Parameters  
SI 65536  
SF 500.1300128 MHz  
WDW EM  
SSB 0  
LB 0.30 Hz  
GB 0  
PC 1.00

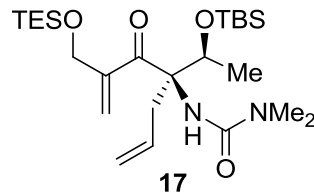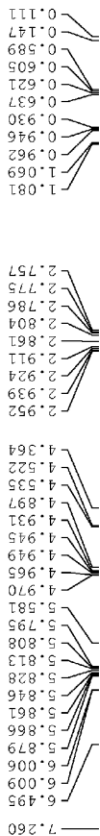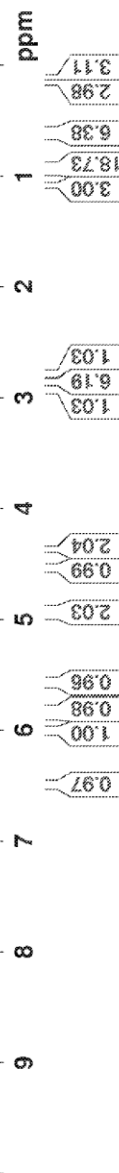

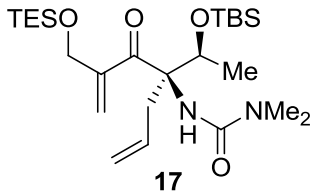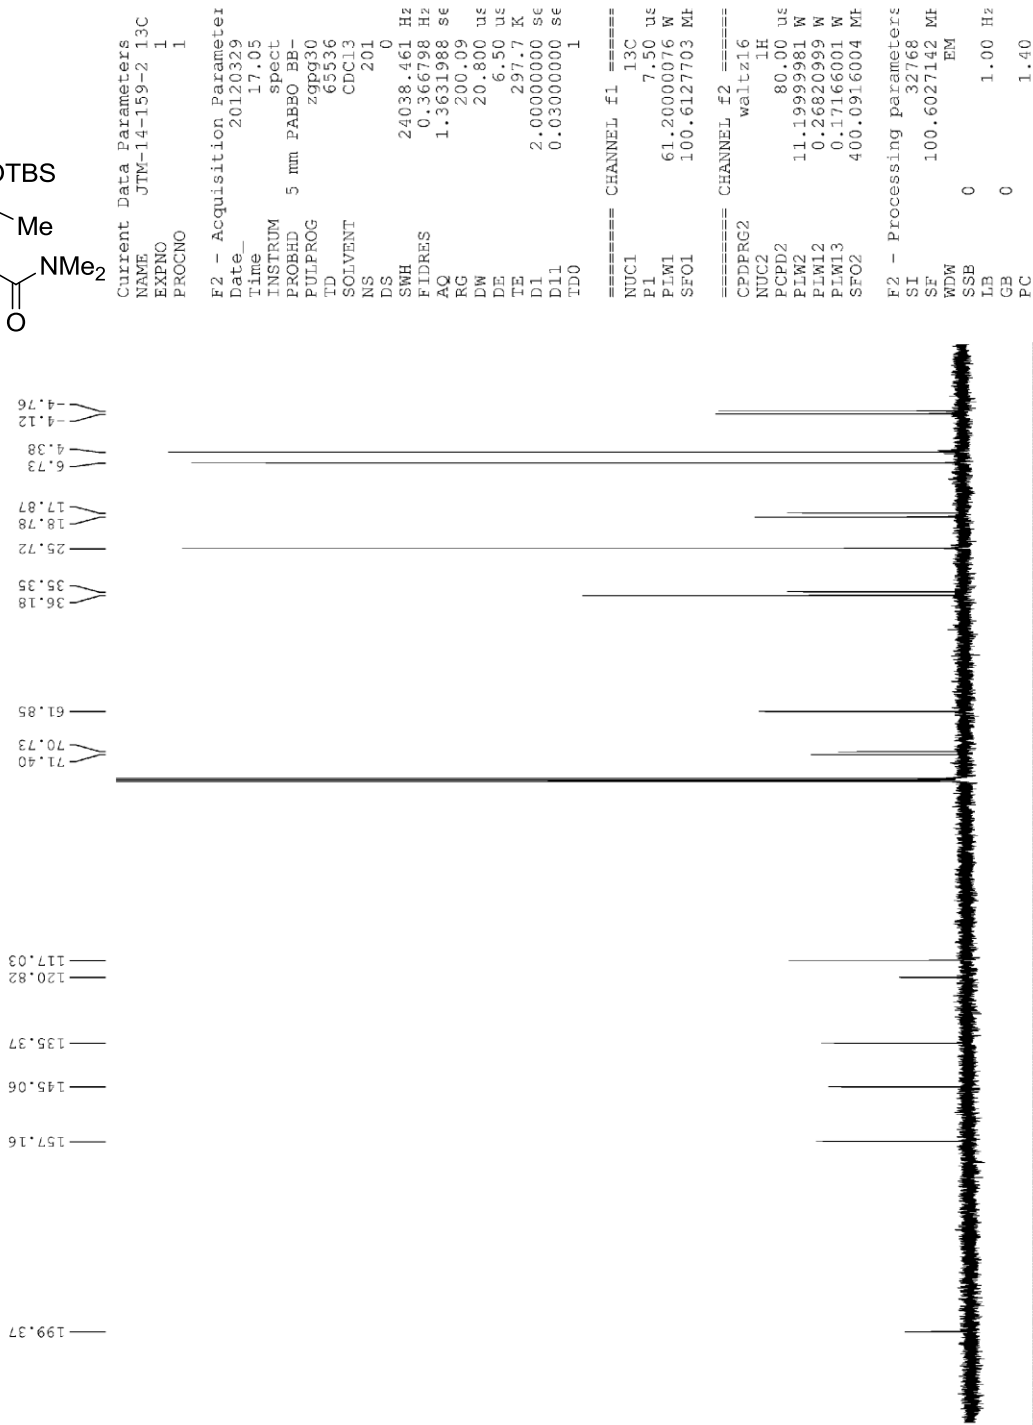

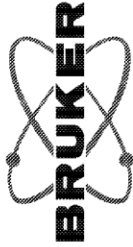

Current Data Parameters  
NAME JTM-14-163-2 LH  
EXPNO 1  
PROCNO 1

F2 - Acquisition Parameters  
Date\_ 20120331  
Time 9.29  
INSTRUM spect  
PROBHD 5 mm PABBO BB-  
PULPROG zg30  
TD 65536  
SOLVENT CDCl3  
NS 15  
DS 0  
SWH 12335.526 Hz  
FIDRES 0.188225 Hz  
AQ 2.6564426 sec  
RG 50.8  
DW 40.533 usec  
DE 6.50 usec  
TE 293.6 K  
D1 1.00000000 sec  
TD0 1

==== CHANNEL f1 =====  
NUC1 1H  
P1 13.60 usec  
PL1 20.00000000 W  
SFO1 600.1337060 MHz  
F2 - Processing parameters  
SI 65536  
SF 600.1300180 MHz  
WDW EM  
SSB 0  
LB 0.30 Hz  
GB 0  
PC 1.00

7.811  
7.260  
6.016  
6.008  
6.000  
5.992  
5.988  
5.984  
5.980  
5.972  
5.963  
5.956  
5.947  
5.531  
5.418  
5.094  
5.065  
5.058  
5.041  
4.980  
4.978  
4.599  
4.588  
4.578  
4.568  
4.409  
4.383  
4.380  
4.225  
4.199  
2.891  
2.881  
2.871  
2.853  
2.595  
2.586  
2.570  
2.562  
1.341  
1.331  
1.319  
0.957  
0.944  
0.930  
0.904  
0.871  
0.814  
0.601  
0.588  
0.574  
0.107  
0.020

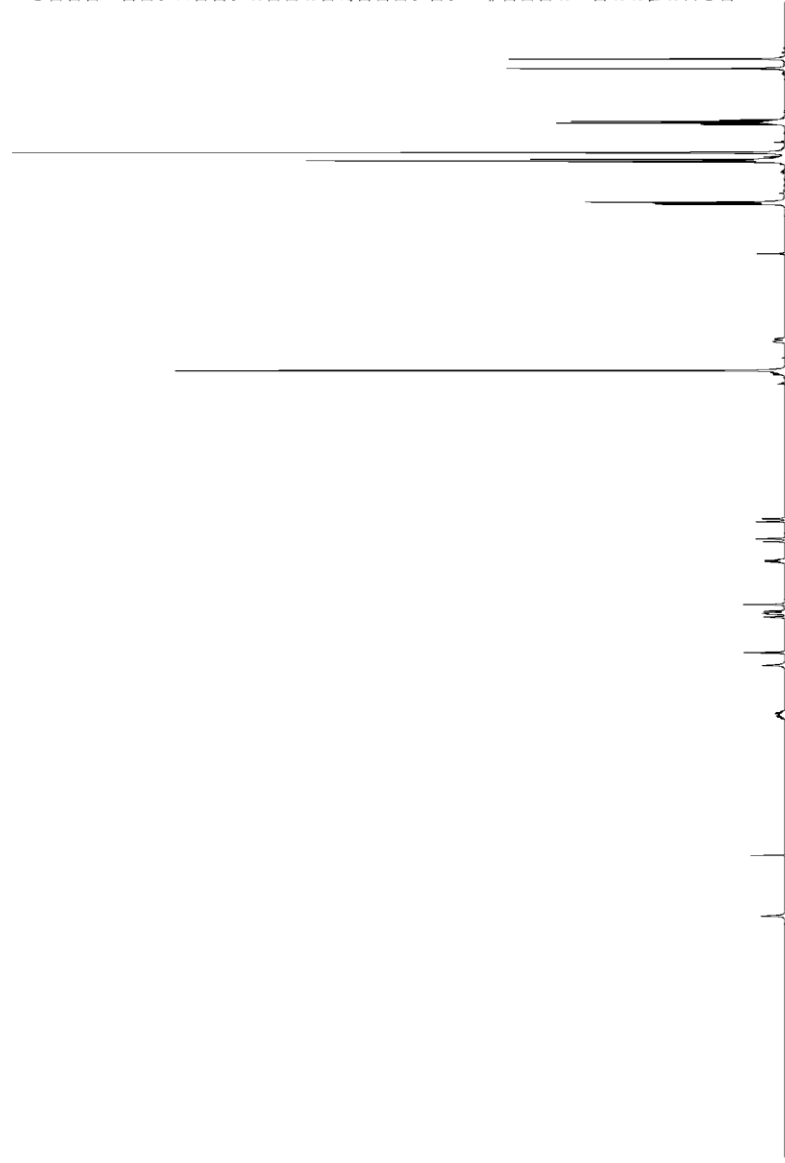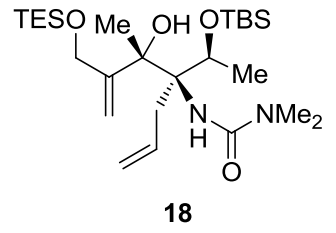

3.37  
3.40  
6.63  
10.20  
10.04  
3.15  
3.21  
1.04  
7.67  
1.07  
1.06  
1.05  
1.11  
2.24  
1.08  
1.03  
1.04  
1.00  
0.01

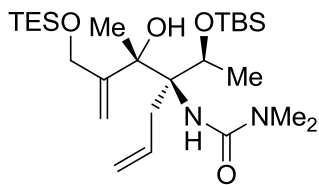

18

Current Data Parameters  
 NAME JTM-14-163-2 13C  
 EXPNO 1  
 PROCNO 1

F2 - Acquisition Parameter  
 Date\_ 20120331  
 Time 9.31  
 INSTRUM spect  
 PROBHD 5 mm PABEO BB-  
 PULPROG zgpg30  
 TD 65536  
 SOLVENT CDCl3  
 NS 141  
 DS 0  
 SWH 36057.691 Hz  
 FIDRES 0.550197 Hz  
 AQ 0.9088159 s  
 RG 203  
 DW 13.867 us  
 DE 10.00 us  
 TE 294.0 K  
 D1 2.00000000 s  
 D11 0.03000000 s  
 TD0 1

==== CHANNEL f1 =====  
 NUC1 13C  
 P1 10.50 us  
 PLW1 110.0000000 W  
 SF01 130.9178981 MHz

==== CHANNEL f2 =====  
 CPDPRG2 waltz16  
 NUC2 1H  
 FCPD2 70.00 us  
 PLW2 20.0000000 W  
 PLW12 0.8000001 W  
 PLW13 0.39199999 W  
 SFO2 600.1324005 MHz

F2 - Processing parameters  
 SI 32768  
 SF 150.9028156 MHz  
 WDW EM  
 SSB 0  
 LB 1.00 Hz  
 GB 0  
 PC 1.40

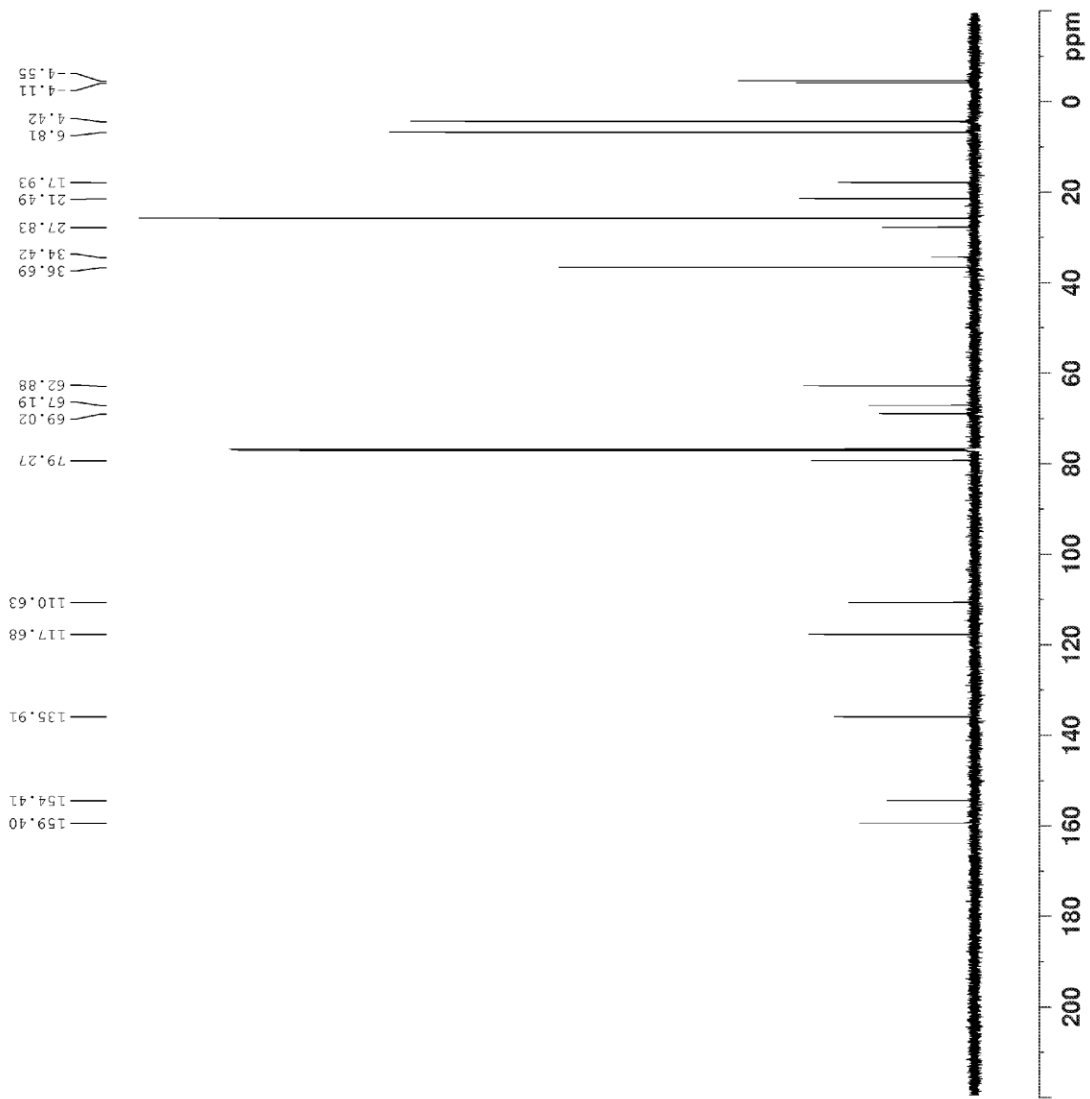

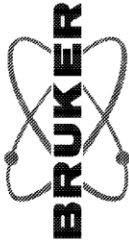

Current Data Parameters  
NAME JTM-14-7-2  
EXPNO 1  
PROCNO 1

F2 - Acquisition Parameters  
Date\_ 20120327  
Time 13.37  
INSTRUM spect  
PROBHD 5 mm PABBI 1H/  
PULPROG zg30  
TD 65536  
SOLVENT CDCl3  
NS 20  
DS 0  
SWH 10330.578 Hz  
FIDRES 0.157632 Hz  
AQ 3.171923 sec  
RG 30.89  
DW 48.400 usec  
DE 6.50 usec  
TE 292.9 K  
D1 1.0000000 sec  
TD0 1

===== CHANNEL f1 =====  
NUC1 1H  
P1 6.03 usec  
PLW1 19.0109968 W  
SF01 500.1330885 MHz  
F2 - Processing parameters  
SI 65536  
SF 500.1300128 MHz  
WDW EM  
SSB 0  
LB 0.30 Hz  
GB 0  
PC 1.00

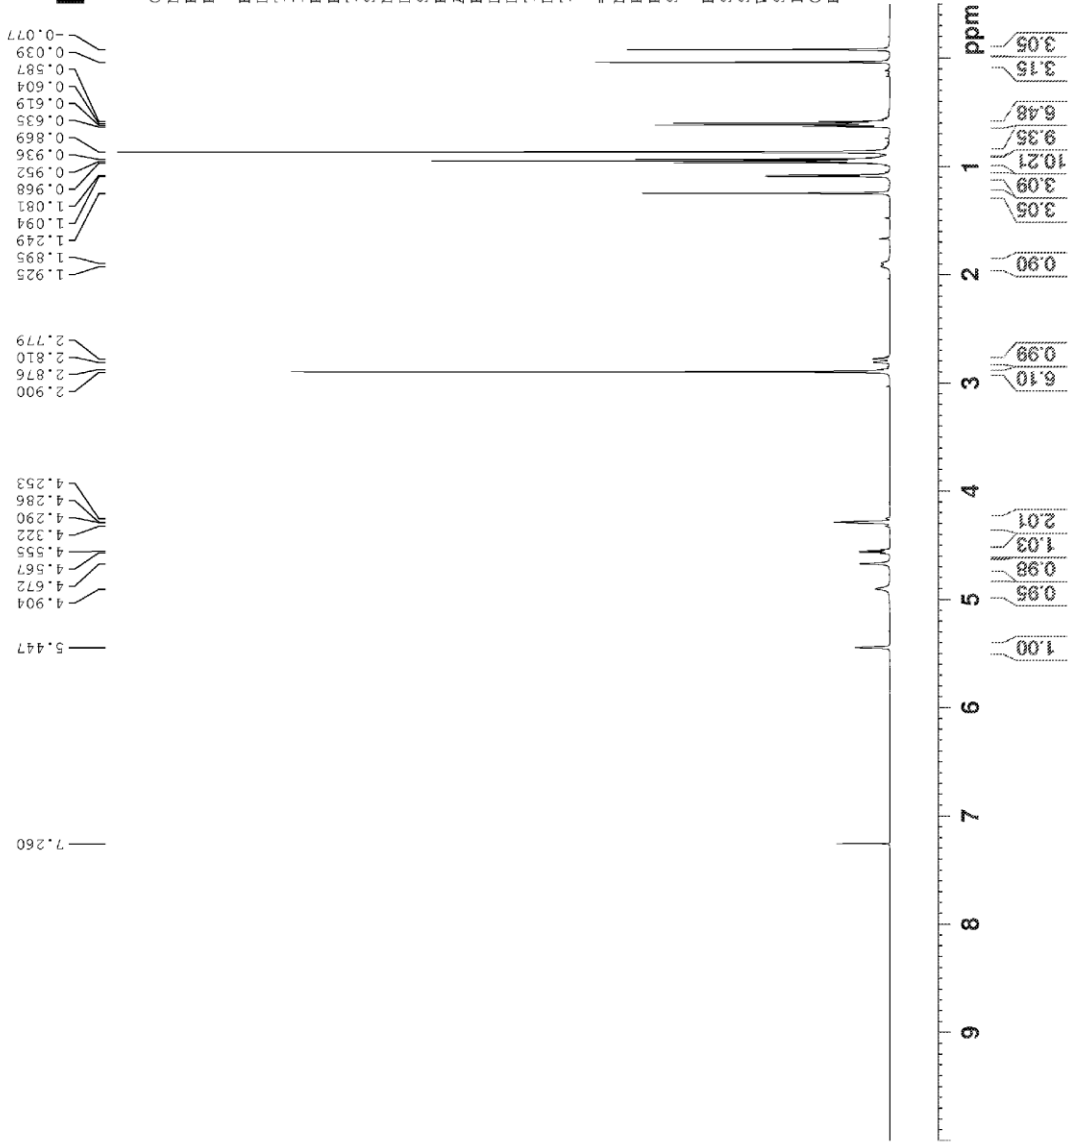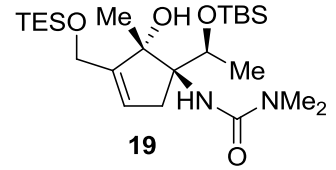

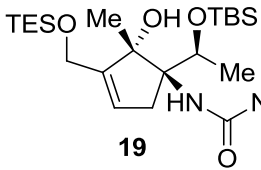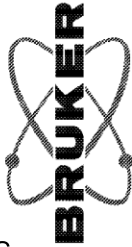

Current Data Parameters  
 NAME JTM-14-7-2\_13C  
 EXPNO 1  
 PROCNO 1

F2 - Acquisition Parameters  
 Date\_ 20120328  
 Time 8.38  
 INSTRUM spect  
 PROBHD 5 mm PABEO BB-  
 PULPROG zgpg30  
 TD 65536  
 SOLVENT CDCl<sub>3</sub>  
 NS 298  
 DS 0  
 SWH 24038.461 Hz  
 FIDRES 0.366798 Hz  
 AQ 1.3631988 sec  
 RG 200.09  
 DW 20.800 usec  
 DE 6.50 usec  
 TE 297.1 K  
 D1 2.00000000 sec  
 D11 0.03000000 sec  
 TD0 1

==== CHANNEL f1 =====  
 NUC1 13C  
 P1 7.50 usec  
 PLW1 61.20000076 W  
 SFO1 100.6127703 MHz

==== CHANNEL f2 =====  
 CPDPRG2 waltz16  
 NUC2 1H  
 PCPD2 80.00 usec  
 PLW2 11.19999981 W  
 PLW12 0.26620999 W  
 PLW13 0.17166001 W  
 SFO2 400.0916004 MHz

F2 - Processing parameters  
 SI 32768  
 SF 100.6027149 MHz  
 EM  
 WDW 0  
 SSB 0  
 LB 1.00 Hz  
 GB 0  
 PC 1.40

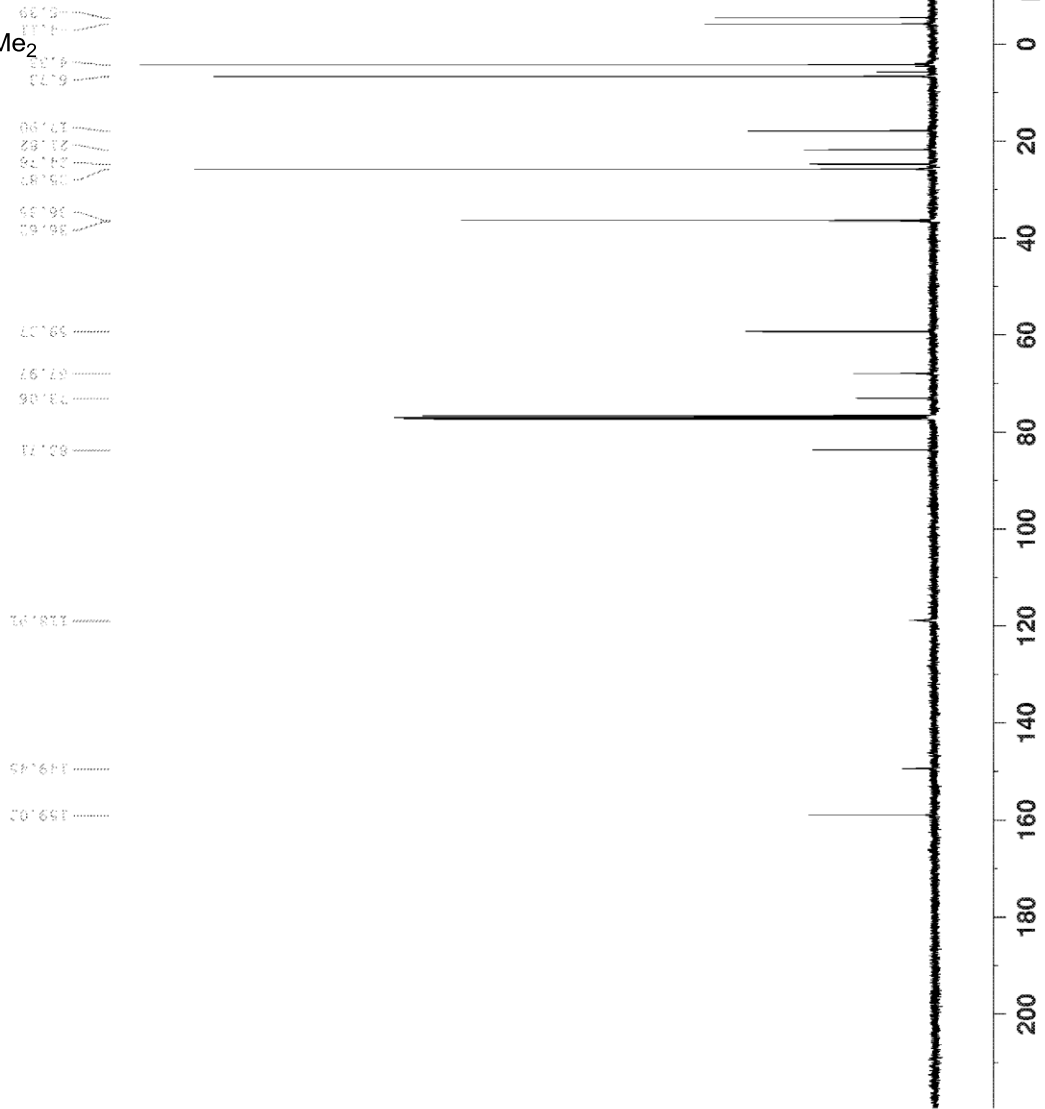



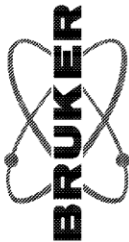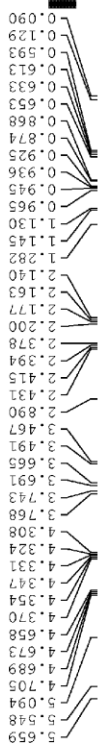

Current Data Parameters  
NAME JTM-14-151-3 1H  
EXPNO 1  
PROCNO 1

F2 - Acquisition Parameters  
Date\_ 20120329  
Time 9.35  
INSTRUM spect  
PROBHD 5 mm PABBO BB-  
PULPROG zg30  
ID 65536  
SOLVENT CDCl3  
NS 16  
DS 0  
SWH 8223.685 Hz  
FIDRES 0.125483 Hz  
AQ 3.9846387 sec  
RG 28.38  
DW 60.800 usec  
DE 6.50 usec  
TE 297.1 K  
D1 1.0000000 sec  
TD0 1

===== CHANNEL f1 =====  
NUC1 1H  
P1 12.38 usec  
PLW1 11.1999981 W  
SFO1 400.0924707 MHz  
F2 - Processing parameters  
SI 65536  
SF 400.0900110 MHz  
WDW EM  
SSB 0  
LB 0  
GB 0  
PC 1.00

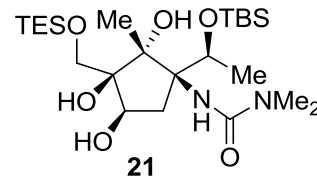

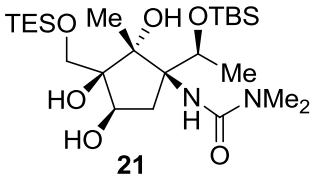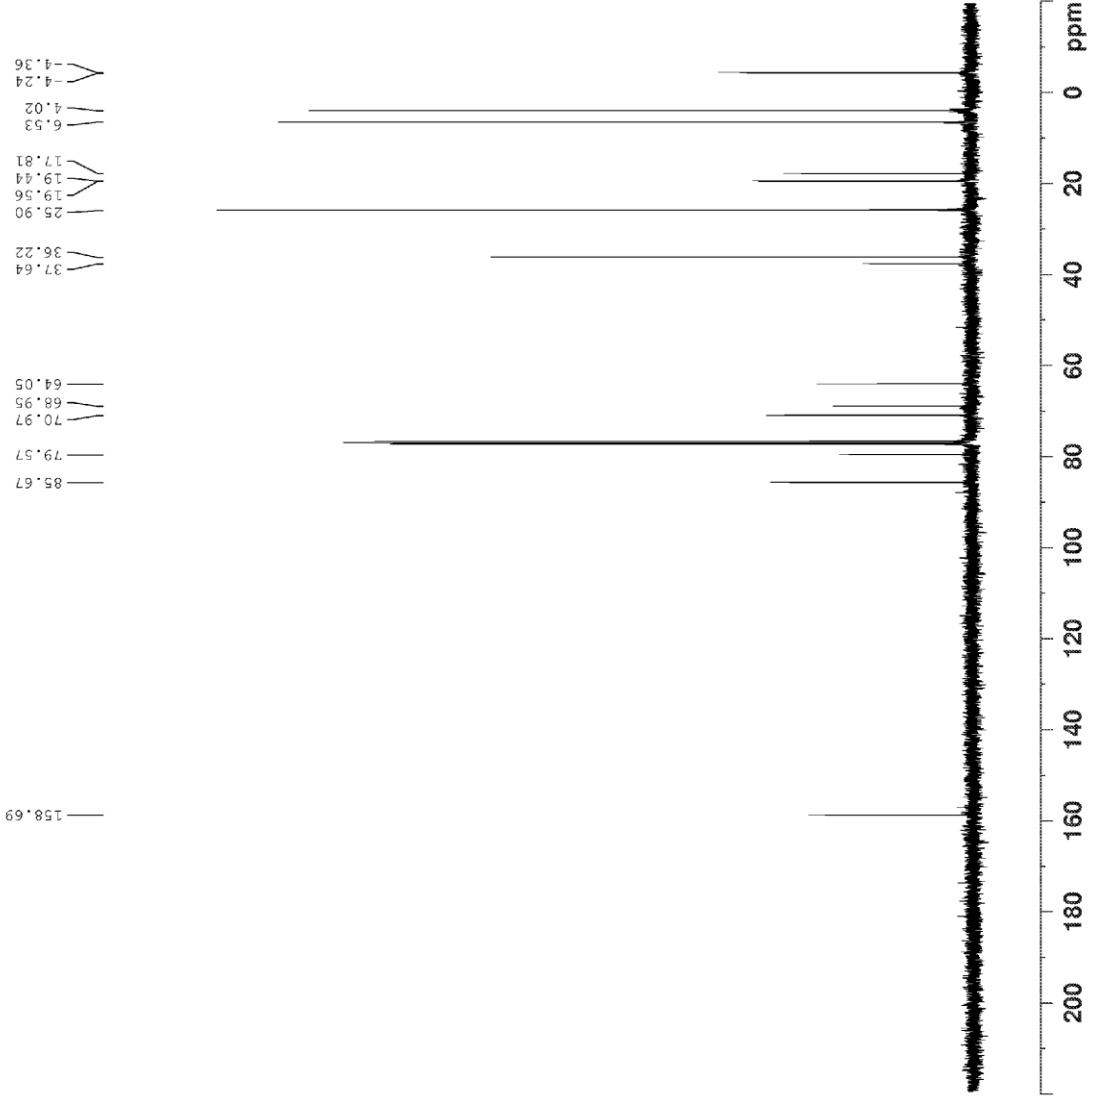

Current Data Parameters  
 NAME JTM-14-151-3 13C  
 EXPNO 1  
 PROCNO 1

F2 - Acquisition Parameter  
 Date\_ 20120329  
 Time 9.40  
 INSTRUM spect  
 PROBHD 5 mm PABBO BB-  
 PULPROG zgpg30  
 TD 65336  
 SOLVENT CDCl3  
 NS 65  
 DS 0  
 SWH 24038.461 Hz  
 FIDRES 0.366798 Hz  
 AQ 1.3631988 s  
 RG 200.09  
 DW 20.800 us  
 DE 6.50 us  
 TE 297.6 K  
 D1 2.00000000 s  
 D11 0.03000000 s  
 TDO 1

==== CHANNEL f1 =====  
 NUC1 13C  
 P1 7.50 us  
 PLW1 61.20000076 W  
 SFO1 100.6127703 MHz

==== CHANNEL f2 =====  
 CPDPRG2 waltz16  
 NUC2 1H  
 PCPD2 80.00 us  
 PLW2 11.19999981 W  
 PLW12 0.26820999 W  
 PLW13 0.171166001 W  
 SFO2 400.0916004 MHz

F2 - Processing parameters  
 SI 32768  
 SF 100.6027164 MHz  
 WDW EM  
 SSB 0  
 LB 1.00 Hz  
 GB 0  
 PC 1.40

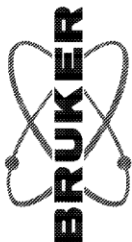

Current Data Parameters  
NAME JTM-14-161-1 IH  
EXPNO 1  
PROCNO 1

F2 - Acquisition Parameters  
Date\_ 20120329  
Time\_ 16.55  
INSTRUM spect  
PROBHD 5 mm PABEO BB-  
PULPROG zg30  
ID 65536  
SOLVENT CDCl3  
NS 13  
DS 0  
SWH 8223.685 Hz  
FIDRES 0.125483 Hz  
AQ 3.9846387 sec  
RG 15.37  
DW 60.800 usec  
DE 6.50 usec  
TE 297.1 K  
D1 1.00000000 sec  
TD0 1

===== CHANNEL f1 =====  
NUC1 IH  
P1 12.38 usec  
PLW1 11.1999981 W  
SF01 400.0924707 MHz  
F2 - Processing parameters  
SI 65536  
SF 400.0900110 MHz  
EM  
WDW 0  
SSB 0  
LB 0.30 Hz  
GB 0  
PC 1.00

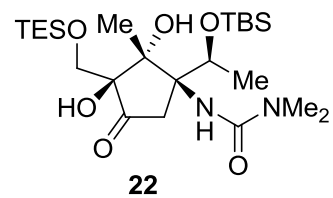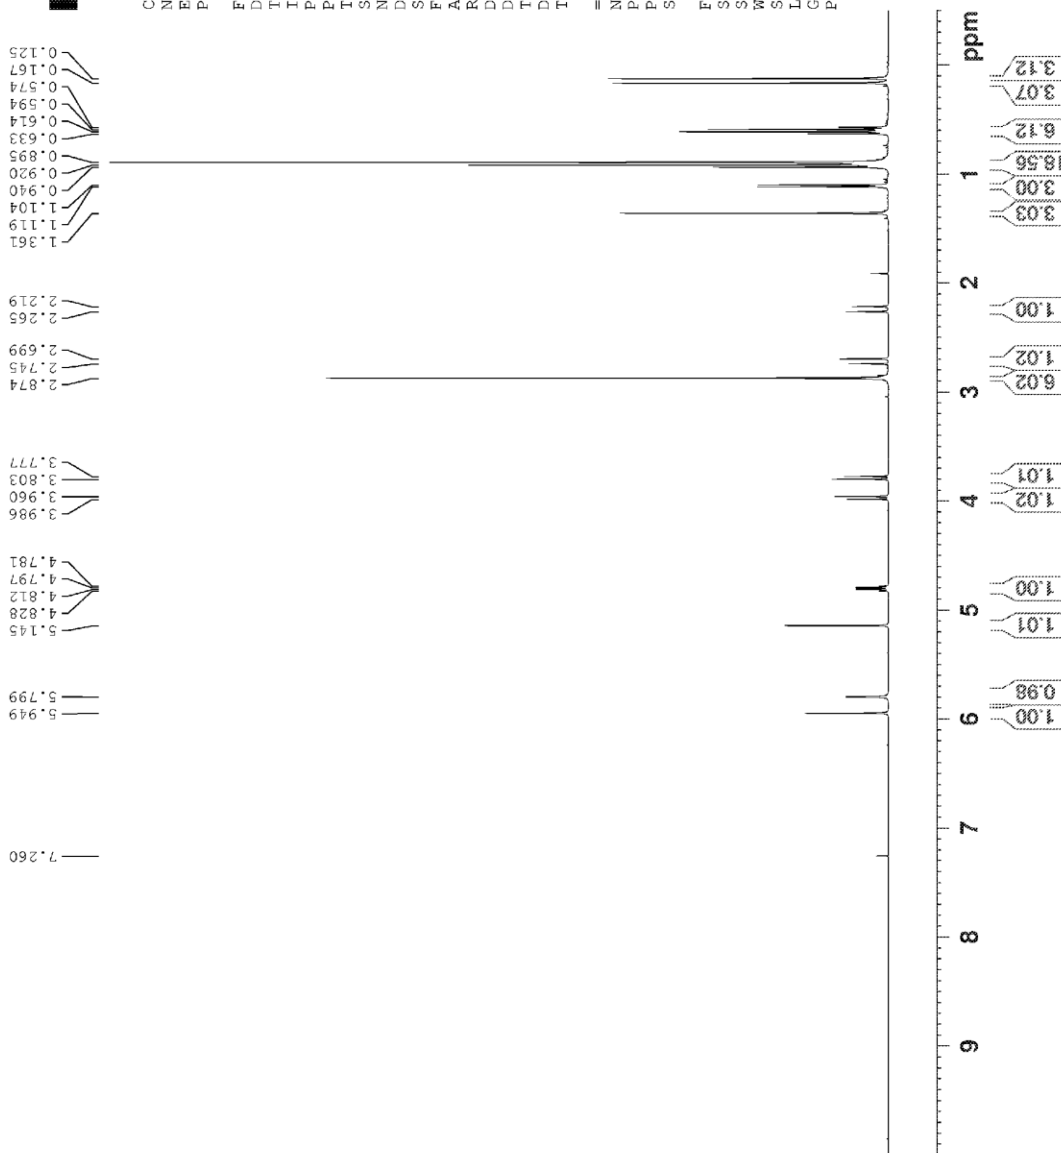

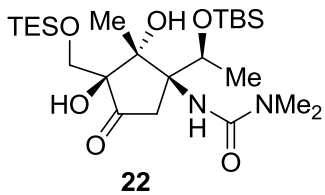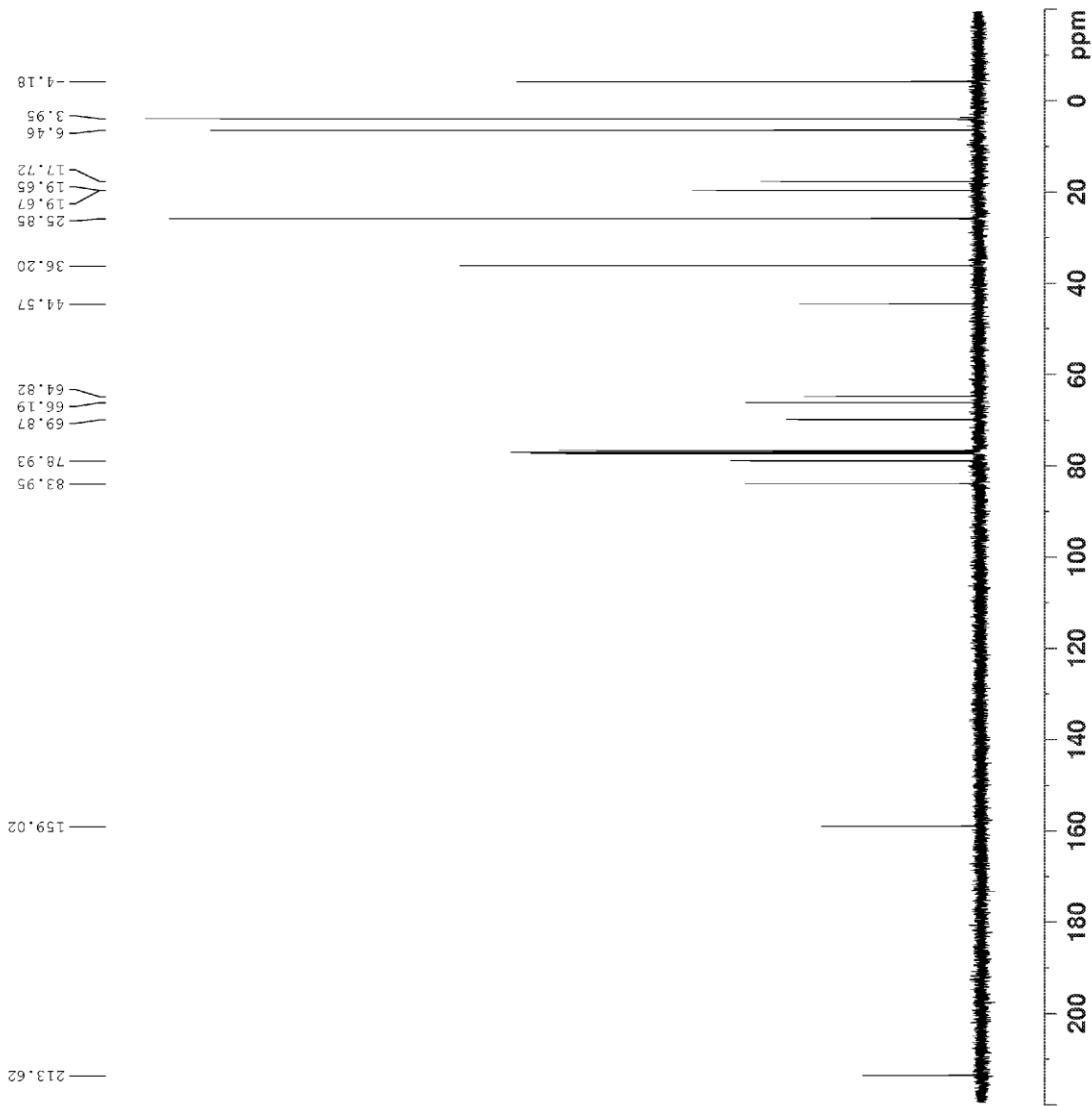

```

Current Data Parameters
NAME      JTM-14-161-1 13C
EXPNO    1
PROCNO   1

F2 - Acquisition Parameter
Date_    20120329
Time     17.00
INSTRUM  spect
PROBHD   5 mm PABBO BB-
PULPROG  zgpg30
TD        65536
SOLVENT  CDCl3
NS        42
DS        0
SWH       24038.461 Hz
FIDRES    0.366798 Hz
AQ         1.3631988 s
RG         200.09
DW         20.800 us
DE         6.50 us
TE         297.6 K
D1         2.00000000 s
D11        0.03000000 s
TD0        1

===== CHANNEL f1 =====
NUC1      13C
P1         7.50 us
PLW1      61.20000076 W
SF01      100.6127703 MHz

===== CHANNEL f2 =====
CPDPRG2   waltz16
NUC2       1H
PCPD2      80.00 us
PLW2      11.19999981 W
PLW12     0.26820999 W
PLW13     0.17166001 W
SFO2      400.0916004 MHz

F2 - Processing parameters
SI         32768
SF         100.6027193 MHz
WDW        EM
SSB        0
LB         1.00 Hz
GB         0
PC         1.40

```

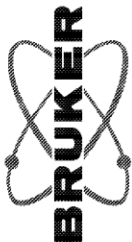

Current Data Parameters  
NAME JTM-13-263-1  
EXPNO 1  
PROCNO 1

F2 - Acquisition Parameters  
Date\_ 20120328  
Time\_ 8.11  
INSTRUM spect  
PROBHD 5 mm PABBO BE-  
PULPROG zg30  
ID 65536  
SOLVENT CDCl3  
NS 13  
DS 0  
SWH 8223.685 Hz  
FIDRES 0.125483 Hz  
AQ 3.9846387 sec  
RG 35.6  
DW 60.800 usec  
DE 6.50 usec  
TE 296.7 K  
D1 1.00000000 sec  
TD0 1

===== CHANNEL f1 =====  
NUC1 1H  
P1 12.38 usec  
PLW1 11.1999981 W  
SF01 400.0924707 MHz  
F2 - Processing parameters  
SI 65536  
SF 400.0900113 MHz  
WDW EM  
SSB 0  
LB 0.30 Hz  
GB 0  
PC 1.00

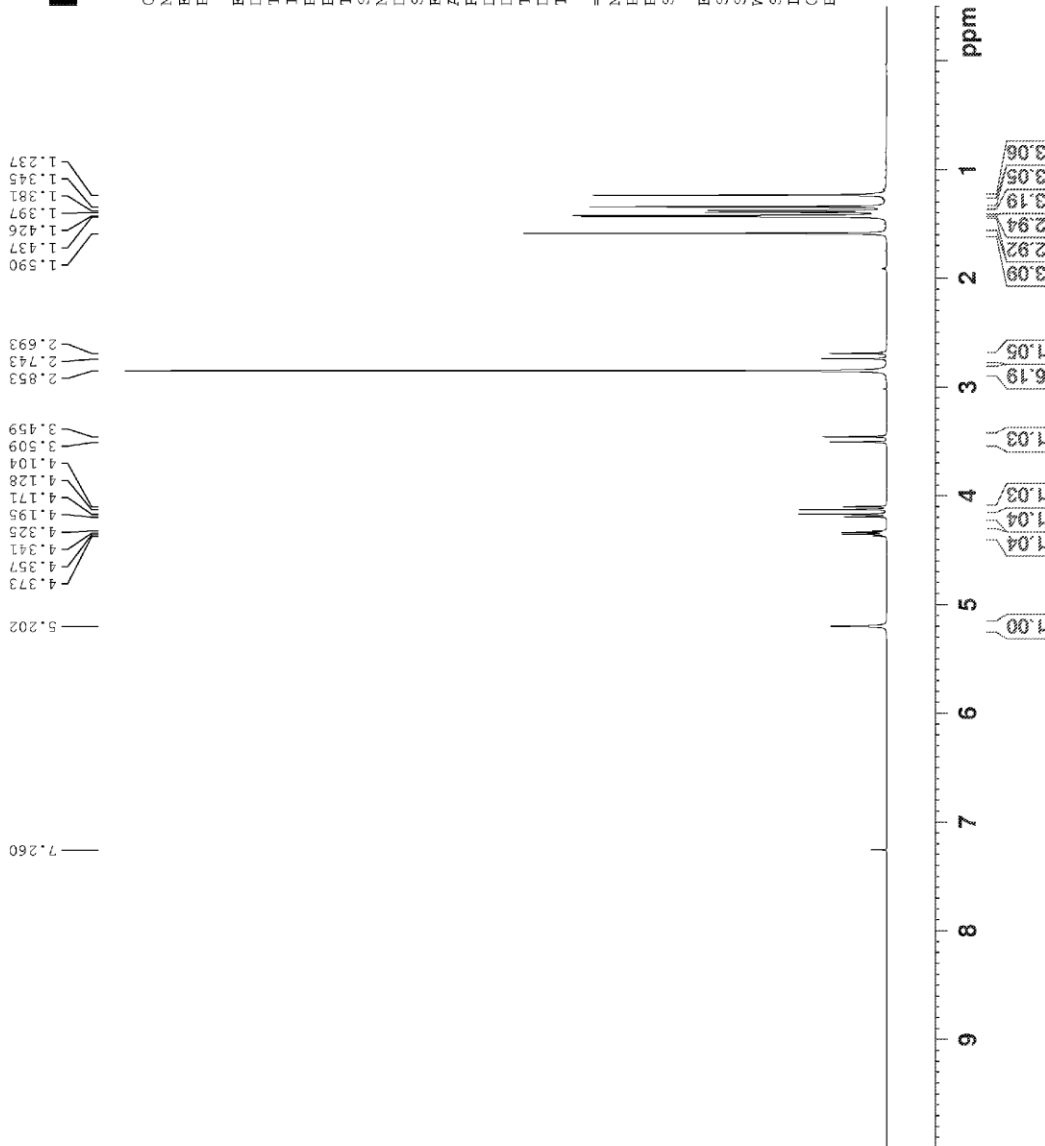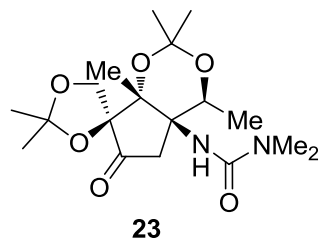

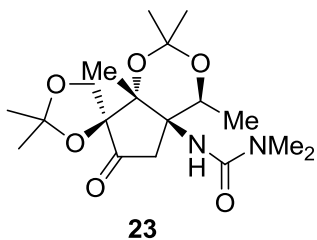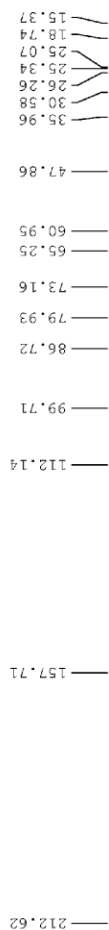

Current Data Parameters  
 NAME JTM-13-263-1 13C  
 EXPNO 1  
 PROCNO 1

F2 - Acquisition Parameter  
 Date\_ 20120328  
 Time 8.14  
 INSTRUM spect  
 PROBHD 5 mm PABBO BB-  
 PULPROG zgpg30  
 TD 65336  
 SOLVENT CDCl3  
 NS 80  
 DS 0  
 SWH 24038.461 Hz  
 FIDRES 0.366798 Hz  
 AQ 1.3631988 s  
 RG 200.09  
 DW 20.800 us  
 DE 6.50 us  
 TE 296.8 K  
 D1 2.00000000 s  
 D11 0.03000000 s  
 TD0 1

==== CHANNEL f1 =====  
 NUC1 13C  
 P1 7.50 us  
 PLW1 61.20000076 W  
 SF01 100.6127703 MHz  
 ===== CHANNEL f2 =====  
 CPDPRG2 waltz16  
 NUC2 1H  
 PCPD2 80.00 us  
 PLW2 11.19999981 W  
 PLWI2 0.26820999 W  
 PLWI3 0.17166001 W  
 SFO2 400.0916004 MHz

F2 - Processing parameters  
 SI 32768  
 SF 100.6027178 MHz  
 WDW EM  
 SSB 0  
 LB 1.00 Hz  
 GB 0  
 PC 1.40

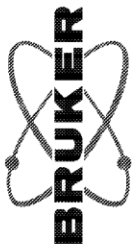

Current Data Parameters  
NAME JTM-6-209-2 IH  
EXPNO 1  
PROCNO 1

F2 - Acquisition Parameters  
Date\_ 20120328  
Time\_ 7.48  
INSTRUM spect  
PROBHD 5 mm PABEO BB-  
PULPROG zg30  
ID 65536  
SOLVENT CDCl3  
NS 11  
DS 0  
SWH 8223.685 Hz  
FIDRES 0.125483 Hz  
AQ 3.9846387 sec  
RG 15.37  
DW 60.800 usec  
DE 6.50 usec  
TE 297.2 K  
D1 1.00000000 sec  
TD0 1

===== CHANNEL f1 =====  
NUC1 IH  
P1 12.38 usec  
PLW1 11.1999981 W  
SF01 400.0924707 MHz  
F2 - Processing parameters  
SI 65536  
SF 400.0900112 MHz  
EM  
WDW 0  
SSB 0  
LB 0.30 Hz  
GB 0  
PC 1.00

5.890  
5.852  
5.514  
5.507  
5.495  
5.489  
5.470  
5.464  
5.452  
5.447  
5.427  
5.025  
4.977  
4.951  
4.691  
4.676  
4.660  
4.644  
3.358  
3.341  
3.322  
3.305  
2.865  
2.795  
2.775  
2.759  
2.739  
2.287  
0.972  
0.966  
0.892  
0.148  
0.072

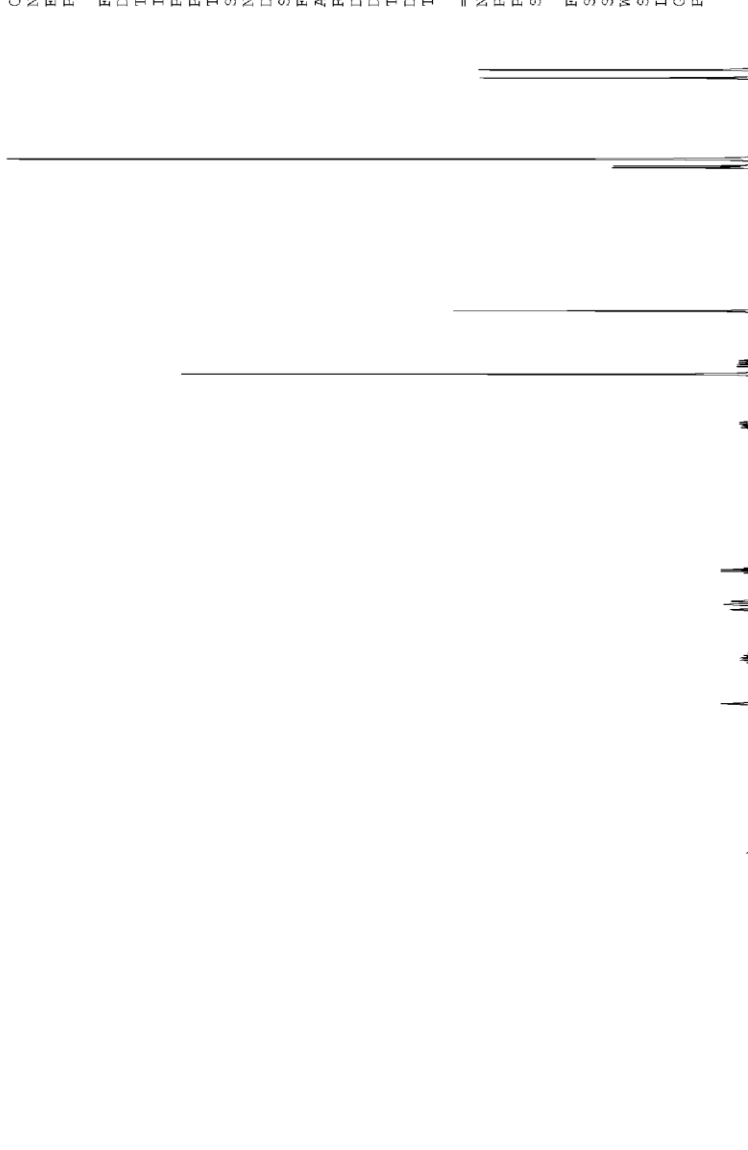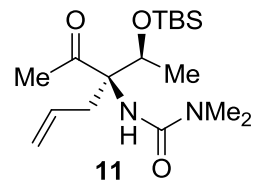

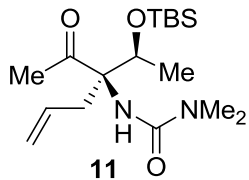

Current Data Parameters  
 NAME JTM-6-209-2 13C  
 EXPNO 1  
 PROCNO 1

F2 - Acquisition Parameter  
 Date\_ 20120328  
 Time\_ 7.53  
 INSTRUM spect  
 PROBHD 5 mm PABEO BB-  
 PULPROG zgpg30  
 TD 65536  
 SOLVENT CDCl3  
 NS 50  
 DS 0  
 SWH 24038.461 Hz  
 FIDRES 0.366798 Hz  
 AQ 1.3631988 sec  
 RG 200.09  
 DW 20.800 usec  
 DE 6.50 usec  
 TE 297.7 K  
 D1 2.00000000 sec  
 D11 0.03000000 sec  
 TDO 1

===== CHANNEL f1 =====  
 NUC1 13C  
 P1 7.50 usec  
 PLW1 61.20000076 W  
 SFO1 100.6127703 MHz  
 ===== CHANNEL f2 =====  
 CPDPRG2 waltz16  
 NUC2 1H  
 PCPD2 80.00 usec  
 PLW2 11.19999981 W  
 PLW12 0.26820999 W  
 PLW13 0.17166001 W  
 SFO2 400.0916004 MHz

F2 - Processing parameters  
 SI 32768  
 SF 100.6027178 MHz  
 WDW EM  
 SSB 0  
 LB 1.00 Hz  
 GB 0  
 PC 1.40

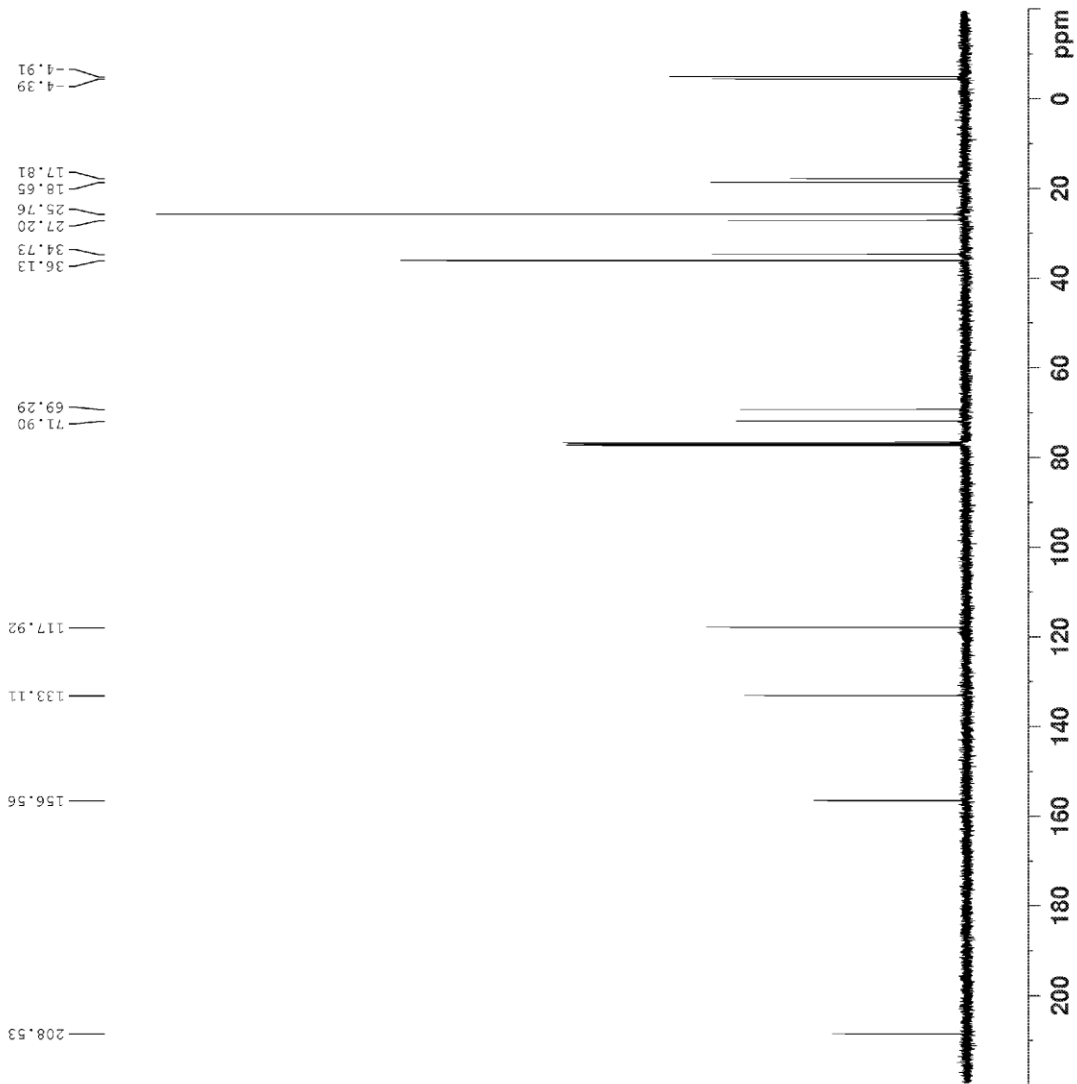





Current Data Parameters  
NAME JTM-14-171-2 1H  
EXPNO 1  
PROCNO 1

F2 - Acquisition Parameters  
Date\_ 20120331  
Time 16.03  
INSTRUM spect  
PROBHD 5 mm PABEO BB-  
PULPROG zg30  
TD 65536  
SOLVENT CDCl3  
NS 13  
DS 0  
SWH 10330.578 Hz  
FIDRES 0.157632 Hz  
AQ 3.1719923 sec  
RG 54.92  
DW 48.400 usec  
DE 6.50 usec  
TE 292.8 K  
D1 1.00000000 sec  
TD0 1

===== CHANNEL f1 =====  
NUC1 1H  
P1 7.25 usec  
PLW1 38.99399948 W  
SFO1 500.1330885 MHz  
F2 - Processing parameters  
SI 65536  
SF 500.1300150 MHz  
WDW EM  
SSB 0  
LB 0  
GB 0  
PC 1.00

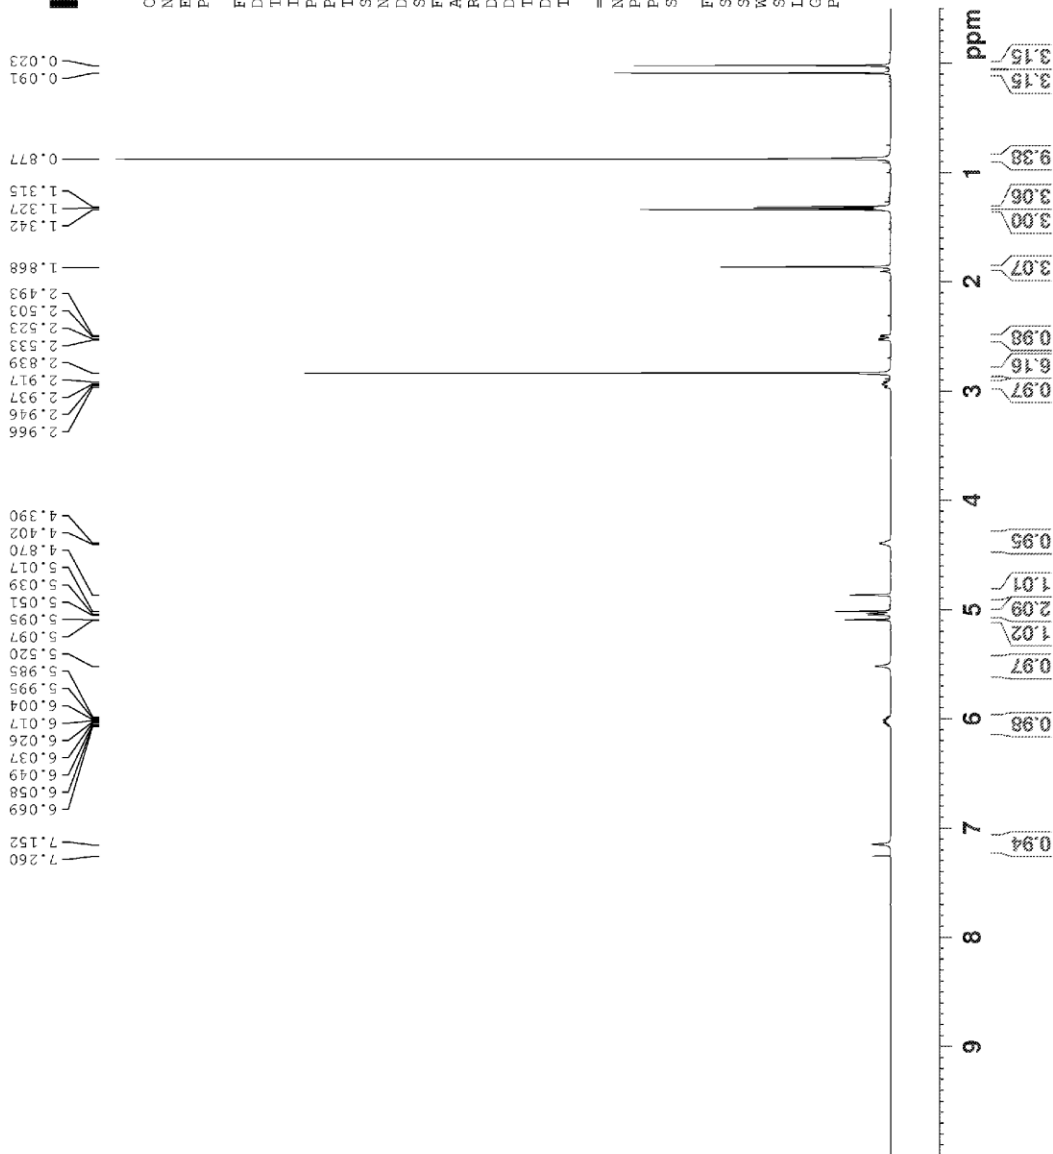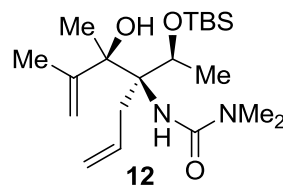

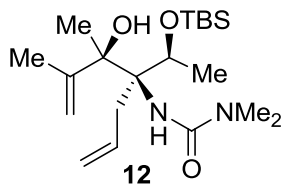

Current Data Parameters  
 NAME JTM-14-171-2 13C  
 EXPNO 1  
 PROCNO 1

F2 - Acquisition Parameter  
 Date\_ 20120331  
 Time 16.06  
 INSTRUM spect  
 PROBHD 5 mm PABEO BB-  
 PULPROG zgpg30  
 TD 65536  
 SOLVENT CDCl3  
 NS 68  
 DS 0  
 SWH 29761.904 Hz  
 FIDRES 0.454131 Hz  
 AQ 1.1010548 s  
 RG 201.39  
 DW 16.800 us  
 DE 6.50 us  
 TE 292.8 K  
 D1 2.00000000 s  
 D11 0.03000000 s  
 TD0 1

==== CHANNEL f1 =====  
 NUC1 13C  
 P1 6.25 us  
 PLW1 110.00000000 W  
 SF01 125.7703637 Mf

==== CHANNEL f2 =====  
 CPDPRG2 waltz16  
 NUC2 1H  
 FCPD2 80.00 us  
 PLW2 38.99399948 W  
 PLW12 0.32025000 W  
 PLW13 0.20496000 W  
 SF02 500.1320005 Mf

F2 - Processing parameters  
 SI 32768  
 SF 125.7577971 Mf  
 WDW EM  
 SSB 0  
 LB 1.00 Hz  
 GB 0  
 PC 1.40

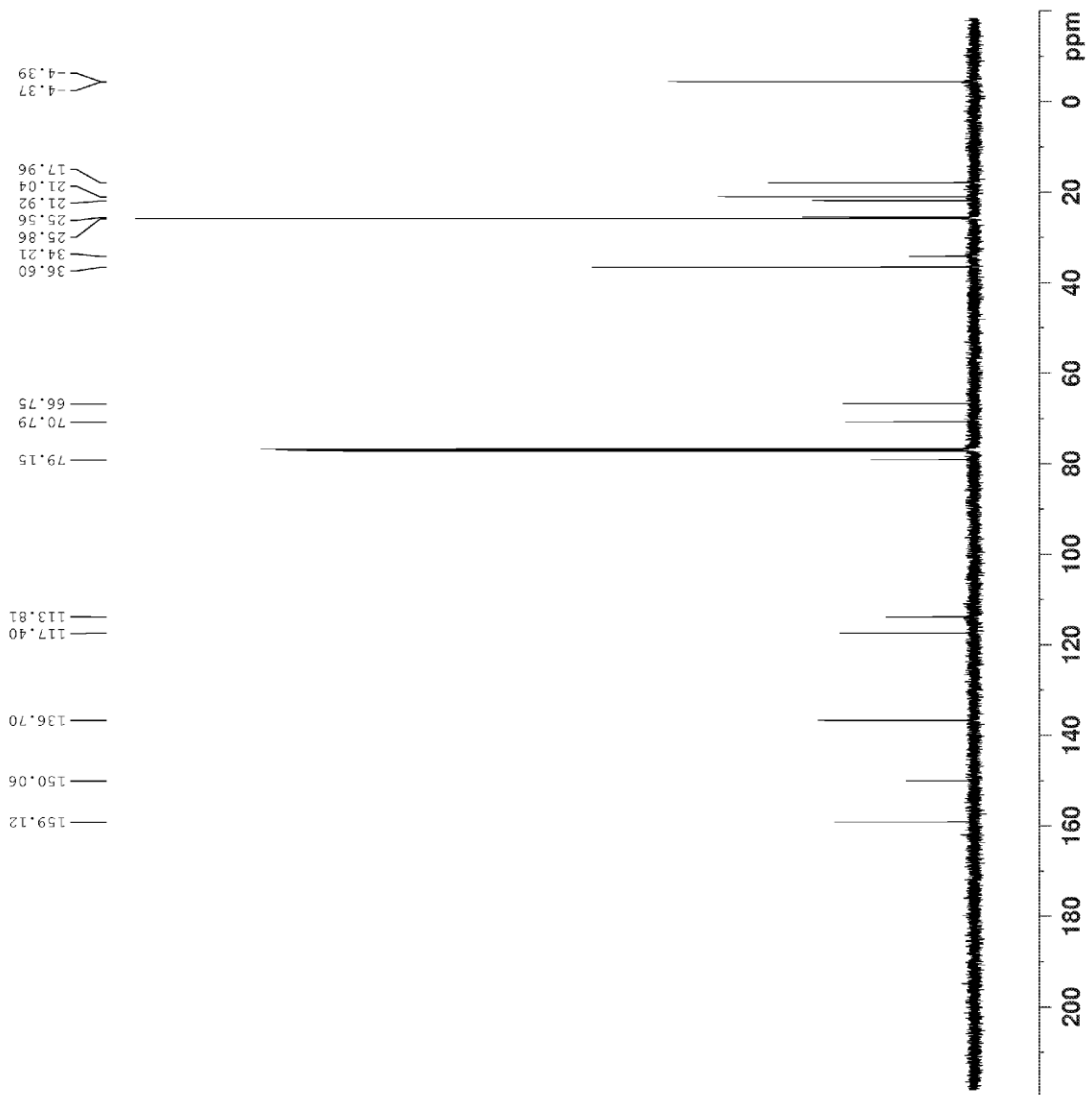

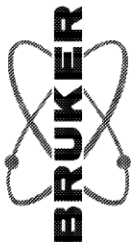

Current Data Parameters  
NAME JTM-14-183-3 1H  
EXPNO 1  
PROCNO 1

F2 - Acquisition Parameters  
Date\_ 20120403  
Time\_ 7.39  
INSTRUM spect  
PROBHD 5 mm PABBO BE-  
PULPROG zg30  
ID 65836  
SOLVENT CDCl3  
NS 11  
DS 0  
SWH 8223.685 Hz  
FIDRES 0.125483 Hz  
AQ 3.9846387 sec  
RG 71.37  
DW 60.800 usec  
DE 6.50 usec  
TE 297.2 K  
D1 1.00000000 sec  
TD0 1

===== CHANNEL f1 =====  
NUC1 1H  
P1 12.38 usec  
PLW1 11.1999981 W  
SF01 400.0924707 MHz  
F2 - Processing parameters  
SI 65836  
SF 400.0900116 MHz  
WDW EM  
SSB 0  
LB 0.30 Hz  
GB 0  
PC 1.00

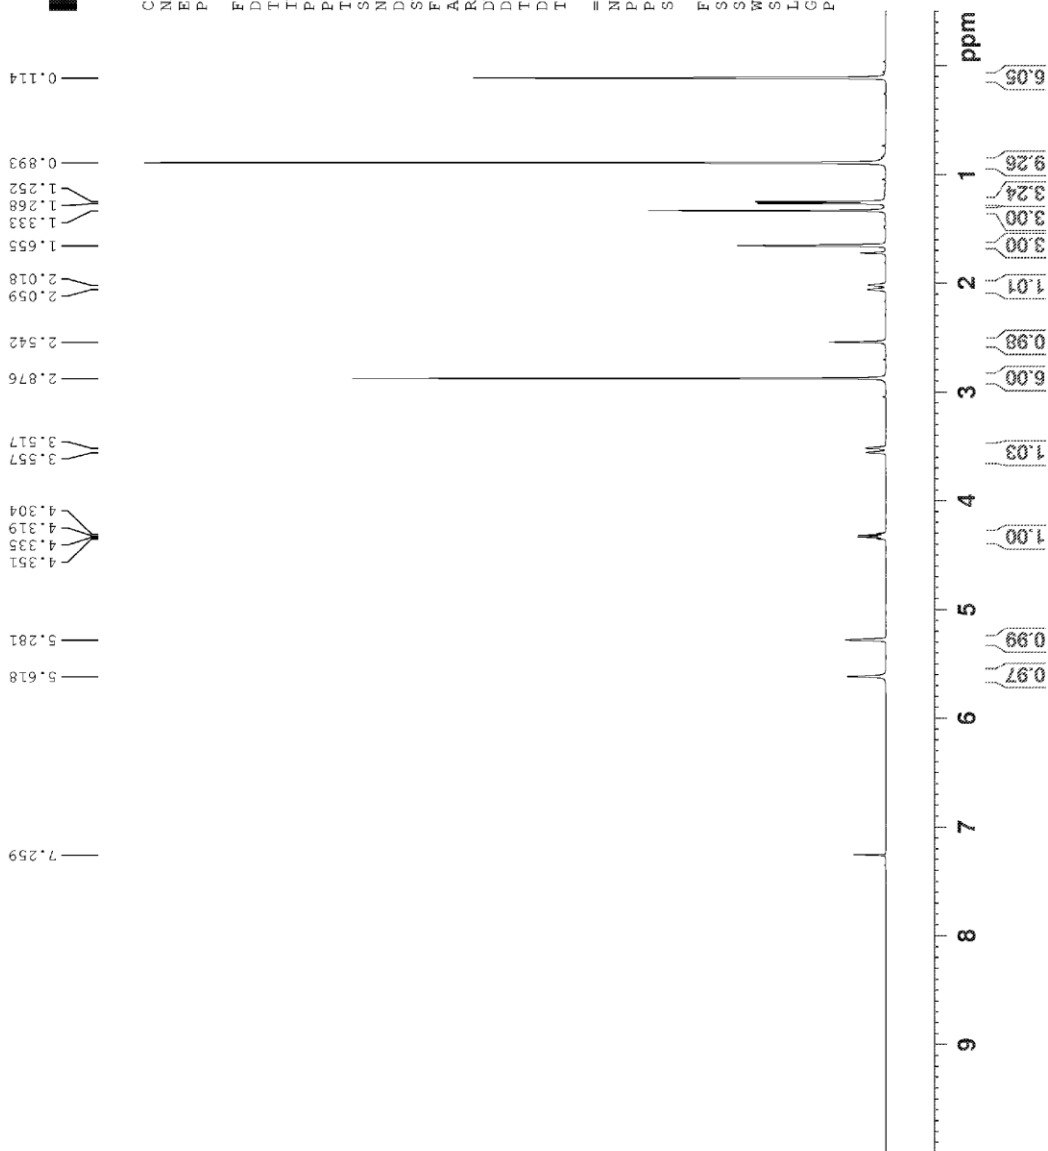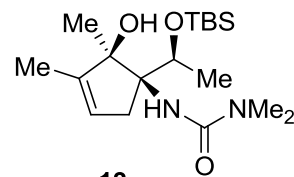

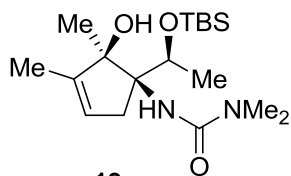

13

Current Data Parameters  
 NAME JTM-14-183-3 13C  
 EXPNO 1  
 PROCNO 1

F2 - Acquisition Parameter  
 Date\_ 20120403  
 Time\_ 7.41  
 INSTRUM spect  
 PROBHD 5 mm PABEO BB-  
 PULPROG zgpg30  
 TD 65536  
 SOLVENT CDCl<sub>3</sub>  
 NS 120  
 DS 4  
 SWH 24038.461 Hz  
 FIDRES 0.366798 Hz  
 AQ 1.3631988 s  
 RG 200.09  
 DW 20.800 us  
 DE 6.50 us  
 TE 297.5 K  
 D1 2.00000000 s  
 D11 0.03000000 s  
 TDO 1

==== CHANNEL f1 =====  
 NUC1 13C  
 P1 7.50 us  
 PLW1 61.20000076 W  
 SFO1 100.6127703 MHz

==== CHANNEL f2 =====  
 CPDPRG2 waltz16  
 NUC2 1H  
 PCPD2 80.00 us  
 PLW2 11.19999981 W  
 PLWI2 0.26820999 W  
 PLWI3 0.1716001 W  
 SFO2 400.0916004 MHz

F2 - Processing parameters  
 SI 32768  
 SF 100.6027142 MHz  
 WDW EM  
 SSB 0  
 LB 1.00 Hz  
 GB 0  
 PC 1.40

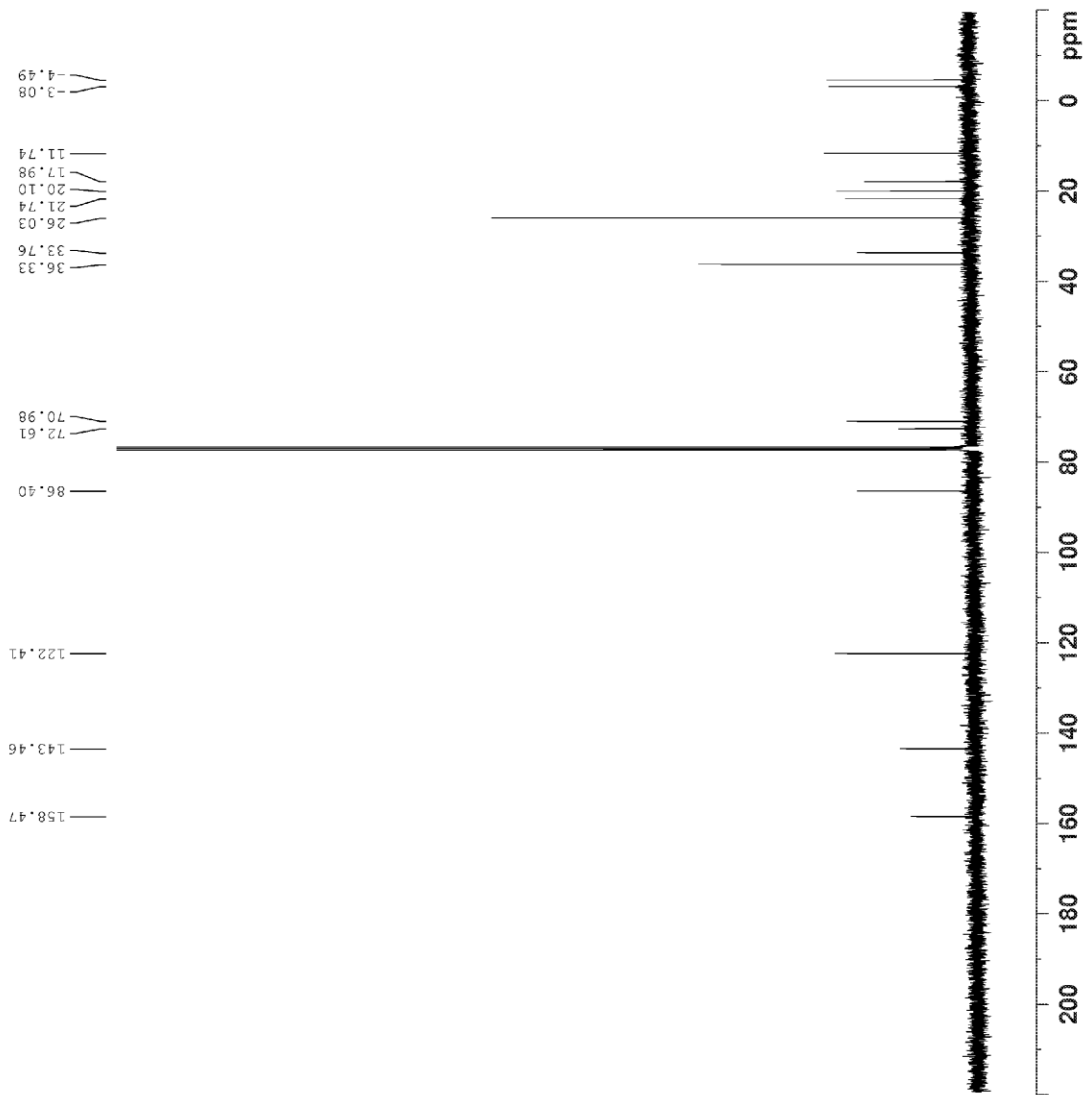

Supplement: NIHMS379657-supplement-2_si_002.pdf [file NIHMS379657-supplement-2_si_002.pdf]
